# Supplementary material for: Role of glucocorticoid and mineralocorticoid receptors in rainbow trout (Oncorhynchus mykiss) skeletal muscle: A transcriptomic perspective of cortisol action
Source: Front Physiol. 2023 Jan 6;13:1048008. doi: 10.3389/fphys.2022.1048008 (PMC9852899; doi:10.3389/fphys.2022.1048008)
Supplement: Supplementary file 2 [file Table3.XLSX]

## Sheet: Hoja1
Category	Term	Count	PValue	Fold Enrichment		Category	Term	Count	PValue	Fold Enrichment		Category	Term	Count	PValue	Fold Enrichment		Category	Term	Count	PValue	Fold Enrichment
GOTERM_BP_DIRECT	GO:0098609~cell-cell adhesion	17	1.37811e-10	8.61453		GOTERM_CC_DIRECT	GO:0016324~apical plasma membrane	34	4.38844e-22	9.21332		GOTERM_MF_DIRECT	GO:0022857~transmembrane transporter activity	15	4.77435e-09	8.12851		KEGG_PATHWAY	hsa05130:Pathogenic Escherichia coli infection	12	0.000133665	4.1401
GOTERM_BP_DIRECT	GO:0006811~ion transport	13	2.44371e-08	8.94029		GOTERM_CC_DIRECT	GO:0070062~extracellular exosome	69	1.39264e-18	3.1528		GOTERM_MF_DIRECT	GO:0005198~structural molecule activity	13	8.72983e-07	6.44195		KEGG_PATHWAY	hsa04976:Bile secretion	8	0.000302429	6.10936
GOTERM_BP_DIRECT	GO:0006814~sodium ion transport	11	3.09266e-08	11.7676		GOTERM_CC_DIRECT	GO:0005886~plasma membrane	96	3.14457e-12	1.9205		GOTERM_MF_DIRECT	GO:0008395~steroid hydroxylase activity	7	1.23816e-06	19.6562		KEGG_PATHWAY	hsa00980:Metabolism of xenobiotics by cytochrome P450	7	0.000928091	6.09957
GOTERM_BP_DIRECT	GO:0098656~anion transmembrane transport	6	4.06105e-06	24.07		GOTERM_CC_DIRECT	GO:0001533~cornified envelope	12	1.15192e-11	20.6129		GOTERM_MF_DIRECT	GO:0015293~symporter activity	9	1.40249e-06	11.1198		KEGG_PATHWAY	hsa04512:ECM-receptor interaction	7	0.00174025	5.40644
GOTERM_BP_DIRECT	GO:0006805~xenobiotic metabolic process	9	8.03048e-06	8.84204		GOTERM_CC_DIRECT	GO:0031526~brush border membrane	12	2.03905e-11	19.6155		GOTERM_MF_DIRECT	GO:0000146~microfilament motor activity	7	2.50764e-06	17.5312		KEGG_PATHWAY	hsa00120:Primary bile acid biosynthesis	4	0.00177374	15.9922
GOTERM_BP_DIRECT	GO:1902476~chloride transmembrane transport	9	9.33046e-06	8.6652		GOTERM_CC_DIRECT	GO:0030057~desmosome	9	7.0396e-11	36.4848		GOTERM_MF_DIRECT	GO:0005506~iron ion binding	11	3.16937e-06	7.17828		KEGG_PATHWAY	hsa04974:Protein digestion and absorption	7	0.00384856	4.61909
GOTERM_BP_DIRECT	GO:0018149~peptide cross-linking	6	1.29468e-05	19.256		GOTERM_CC_DIRECT	GO:0005903~brush border	10	9.17099e-09	16.3462		GOTERM_MF_DIRECT	GO:0015301~anion:anion antiporter activity	6	3.9068e-06	24.1735		KEGG_PATHWAY	hsa00982:Drug metabolism - cytochrome P450	6	0.00390416	5.66389
GOTERM_BP_DIRECT	GO:0008544~epidermis development	8	2.61914e-05	9.16952		GOTERM_CC_DIRECT	GO:0016323~basolateral plasma membrane	16	1.4366e-08	6.81321		GOTERM_MF_DIRECT	GO:0051015~actin filament binding	13	5.98114e-06	5.35398		KEGG_PATHWAY	hsa05412:Arrhythmogenic right ventricular cardiomyopathy	6	0.00520493	5.2961
GOTERM_BP_DIRECT	GO:0006082~organic acid metabolic process	5	5.77101e-05	22.9238		GOTERM_CC_DIRECT	GO:0016328~lateral plasma membrane	9	5.84697e-07	12.4948		GOTERM_MF_DIRECT	GO:0016712~oxidoreductase activity, acting on paired donors, with incorporation or reduction of molecular oxygen, reduced flavin or flavoprotein as one donor, and incorporation of one atom of oxygen	6	7.43987e-06	21.3842		KEGG_PATHWAY	hsa00983:Drug metabolism - other enzymes	6	0.00611839	5.0975
GOTERM_BP_DIRECT	GO:0045104~intermediate filament cytoskeleton organization	5	5.77101e-05	22.9238		GOTERM_CC_DIRECT	GO:0005912~adherens junction	12	1.31119e-06	6.94948		GOTERM_MF_DIRECT	GO:0031994~insulin-like growth factor I binding	5	8.55479e-06	35.6404		KEGG_PATHWAY	hsa04670:Leukocyte transendothelial migration	7	0.0063091	4.17339
GOTERM_BP_DIRECT	GO:0042738~exogenous drug catabolic process	5	0.000100004	20.0583		GOTERM_CC_DIRECT	GO:0015629~actin cytoskeleton	14	1.72761e-06	5.49942		GOTERM_MF_DIRECT	GO:0038132~neuregulin binding	4	1.20086e-05	74.132		KEGG_PATHWAY	hsa04510:Focal adhesion	9	0.00899735	3.04328
GOTERM_BP_DIRECT	GO:0007229~integrin-mediated signaling pathway	8	0.000146824	7.00218		GOTERM_CC_DIRECT	GO:0005911~cell-cell junction	12	3.22893e-06	6.33416		GOTERM_MF_DIRECT	GO:0003779~actin binding	14	8.00571e-05	3.82687		KEGG_PATHWAY	hsa00053:Ascorbate and aldarate metabolism	4	0.00922825	9.06222
GOTERM_BP_DIRECT	GO:1990961~drug transmembrane export	4	0.000223293	32.0933		GOTERM_CC_DIRECT	GO:0030054~cell junction	13	3.33176e-06	5.6789		GOTERM_MF_DIRECT	GO:0003774~motor activity	6	0.0001599	11.5831		KEGG_PATHWAY	hsa04978:Mineral absorption	5	0.0112097	5.66389
GOTERM_BP_DIRECT	GO:0007155~cell adhesion	17	0.000230412	2.93853		GOTERM_CC_DIRECT	GO:0005882~intermediate filament	10	6.75429e-06	7.62004		GOTERM_MF_DIRECT	GO:0004497~monooxygenase activity	7	0.00016662	8.53494		KEGG_PATHWAY	hsa05150:Staphylococcus aureus infection	6	0.012951	4.24792
GOTERM_BP_DIRECT	GO:0030855~epithelial cell differentiation	7	0.00043251	7.16979		GOTERM_CC_DIRECT	GO:0005887~integral component of plasma membrane	34	1.13548e-05	2.285		GOTERM_MF_DIRECT	GO:0020037~heme binding	9	0.000219817	5.5599		KEGG_PATHWAY	hsa00040:Pentose and glucuronate interconversions	4	0.014114	7.76762
GOTERM_BP_DIRECT	GO:0070365~hepatocyte differentiation	4	0.000551307	24.07		GOTERM_CC_DIRECT	GO:0005856~cytoskeleton	17	9.2892e-05	3.18464		GOTERM_MF_DIRECT	GO:0070330~aromatase activity	5	0.000248382	15.9767		KEGG_PATHWAY	hsa04915:Estrogen signaling pathway	7	0.0153553	3.44758
GOTERM_BP_DIRECT	GO:0045109~intermediate filament organization	6	0.000600947	8.75273		GOTERM_CC_DIRECT	GO:0016459~myosin complex	6	0.000116541	12.4098		GOTERM_MF_DIRECT	GO:0005343~organic acid:sodium symporter activity	3	0.000341805	92.665		KEGG_PATHWAY	hsa05204:Chemical carcinogenesis - DNA adducts	5	0.0179894	4.92512
GOTERM_BP_DIRECT	GO:0015742~alpha-ketoglutarate transport	3	0.000628952	72.21		GOTERM_CC_DIRECT	GO:0009925~basal plasma membrane	6	0.000141303	11.9231		GOTERM_MF_DIRECT	GO:0016705~oxidoreductase activity, acting on paired donors, with incorporation or reduction of molecular oxygen	6	0.000424958	9.42356		KEGG_PATHWAY	hsa05205:Proteoglycans in cancer	8	0.0300968	2.65236
GOTERM_BP_DIRECT	GO:0019557~histidine catabolic process to glutamate and formate	3	0.000628952	72.21		GOTERM_CC_DIRECT	GO:0016021~integral component of membrane	77	0.000245362	1.44352		GOTERM_MF_DIRECT	GO:0005452~inorganic anion exchanger activity	4	0.000504679	24.7107		KEGG_PATHWAY	hsa04151:PI3K-Akt signaling pathway	11	0.0336646	2.11196
GOTERM_BP_DIRECT	GO:0019556~histidine catabolic process to glutamate and formamide	3	0.000628952	72.21		GOTERM_CC_DIRECT	GO:0016327~apicolateral plasma membrane	4	0.0014286	17.6255		GOTERM_MF_DIRECT	GO:0098641~cadherin binding involved in cell-cell adhesion	4	0.000883855	20.5922		KEGG_PATHWAY	hsa04380:Osteoclast differentiation	6	0.0389685	3.18594
GOTERM_BP_DIRECT	GO:0035725~sodium ion transmembrane transport	7	0.000859491	6.29869		GOTERM_CC_DIRECT	GO:0034707~chloride channel complex	5	0.00145923	10.1347		GOTERM_MF_DIRECT	GO:0050839~cell adhesion molecule binding	6	0.000934067	7.94272		KEGG_PATHWAY	hsa04810:Regulation of actin cytoskeleton	8	0.0399822	2.49419
GOTERM_BP_DIRECT	GO:0006821~chloride transport	6	0.000895027	8.02333		GOTERM_CC_DIRECT	GO:0009986~cell surface	16	0.00164292	2.54161		GOTERM_MF_DIRECT	GO:0086083~cell adhesive protein binding involved in bundle of His cell-Purkinje myocyte communication	3	0.00112327	55.599		KEGG_PATHWAY	hsa00340:Histidine metabolism	3	0.0403231	9.26818
GOTERM_BP_DIRECT	GO:0030050~vesicle transport along actin filament	4	0.000932417	20.2695		GOTERM_CC_DIRECT	GO:0031982~vesicle	8	0.00169128	4.65961		GOTERM_MF_DIRECT	GO:0005509~calcium ion binding	19	0.00128695	2.34127		KEGG_PATHWAY	hsa04977:Vitamin digestion and absorption	3	0.0472824	8.49583
GOTERM_BP_DIRECT	GO:0010628~positive regulation of gene expression	15	0.000933461	2.8152		GOTERM_CC_DIRECT	GO:0031528~microvillus membrane	4	0.00282281	13.9788		GOTERM_MF_DIRECT	GO:0042802~identical protein binding	33	0.00139591	1.78618		KEGG_PATHWAY	hsa00290:Valine, leucine and isoleucine biosynthesis	2	0.0571073	33.9833
GOTERM_BP_DIRECT	GO:0042493~response to drug	11	0.000976163	3.61461		GOTERM_CC_DIRECT	GO:0005925~focal adhesion	12	0.00327256	2.8683		GOTERM_MF_DIRECT	GO:0042910~xenobiotic transporter activity	4	0.00140684	17.6505		KEGG_PATHWAY	hsa00140:Steroid hormone biosynthesis	4	0.0592105	4.45683
GOTERM_BP_DIRECT	GO:0086073~bundle of His cell-Purkinje myocyte adhesion involved in cell communication	3	0.00155105	48.14		GOTERM_CC_DIRECT	GO:0016342~catenin complex	4	0.00374996	12.6683		GOTERM_MF_DIRECT	GO:0005178~integrin binding	8	0.00179451	4.60447		KEGG_PATHWAY	hsa00830:Retinol metabolism	4	0.0767265	3.99804
GOTERM_BP_DIRECT	GO:0009617~response to bacterium	7	0.00162303	5.56992		GOTERM_CC_DIRECT	GO:0005902~microvillus	5	0.00579089	6.94154		GOTERM_MF_DIRECT	GO:0004222~metalloendopeptidase activity	7	0.00188658	5.40546		KEGG_PATHWAY	hsa04514:Cell adhesion molecules	6	0.0792707	2.59745
GOTERM_BP_DIRECT	GO:0098719~sodium ion import across plasma membrane	4	0.00165311	16.7443		GOTERM_CC_DIRECT	GO:0001725~stress fiber	5	0.00579089	6.94154		GOTERM_MF_DIRECT	GO:0045296~cadherin binding	11	0.00226118	3.22568		KEGG_PATHWAY	hsa01200:Carbon metabolism	5	0.0870861	2.95507
GOTERM_BP_DIRECT	GO:0042908~xenobiotic transport	4	0.00165311	16.7443		GOTERM_CC_DIRECT	GO:0014704~intercalated disc	4	0.0123338	8.27319		GOTERM_MF_DIRECT	GO:0030165~PDZ domain binding	6	0.00299484	6.10978		KEGG_PATHWAY	hsa03320:PPAR signaling pathway	4	0.0962407	3.62489
GOTERM_BP_DIRECT	GO:0007156~homophilic cell adhesion via plasma membrane adhesion molecules	8	0.00210918	4.47814		GOTERM_CC_DIRECT	GO:0005737~cytoplasm	70	0.0153657	1.27365		GOTERM_MF_DIRECT	GO:0003824~catalytic activity	7	0.00304277	4.91405
GOTERM_BP_DIRECT	GO:0045471~response to ethanol	7	0.00261576	5.06737		GOTERM_CC_DIRECT	GO:0071944~cell periphery	4	0.0160244	7.50715		GOTERM_MF_DIRECT	GO:0001968~fibronectin binding	4	0.00481123	11.5831
GOTERM_BP_DIRECT	GO:0006699~bile acid biosynthetic process	4	0.00264871	14.2637		GOTERM_CC_DIRECT	GO:0032982~myosin filament	3	0.0178186	14.4781		GOTERM_MF_DIRECT	GO:0005254~chloride channel activity	5	0.00615285	6.8136
GOTERM_BP_DIRECT	GO:0030216~keratinocyte differentiation	5	0.00343577	8.02333		GOTERM_CC_DIRECT	GO:0045111~intermediate filament cytoskeleton	4	0.019376	6.98942		GOTERM_MF_DIRECT	GO:0005516~calmodulin binding	8	0.00678474	3.6162
GOTERM_BP_DIRECT	GO:0015698~inorganic anion transport	4	0.00359393	12.8373		GOTERM_CC_DIRECT	GO:0071133~alpha9-beta1 integrin-ADAM8 complex	2	0.0195407	101.347		GOTERM_MF_DIRECT	GO:0015562~efflux transmembrane transporter activity	3	0.00959154	19.8568
GOTERM_BP_DIRECT	GO:0009410~response to xenobiotic stimulus	9	0.00366947	3.59552		GOTERM_CC_DIRECT	GO:0045095~keratin filament	5	0.0199888	4.82603		GOTERM_MF_DIRECT	GO:0005215~transporter activity	4	0.00963641	9.04049
GOTERM_BP_DIRECT	GO:0042060~wound healing	6	0.00433188	5.60854		GOTERM_CC_DIRECT	GO:0009898~cytoplasmic side of plasma membrane	4	0.0221244	6.64567		GOTERM_MF_DIRECT	GO:0015171~amino acid transmembrane transporter activity	4	0.00963641	9.04049
GOTERM_BP_DIRECT	GO:0010888~negative regulation of lipid storage	3	0.00452803	28.884		GOTERM_CC_DIRECT	GO:0016460~myosin II complex	3	0.0229735	12.6683		GOTERM_MF_DIRECT	GO:0008483~transaminase activity	3	0.0109895	18.533
GOTERM_BP_DIRECT	GO:0070633~transepithelial transport	3	0.00452803	28.884		GOTERM_CC_DIRECT	GO:0035866~alphav-beta3 integrin-PKCalpha complex	2	0.029168	67.5644		GOTERM_MF_DIRECT	GO:0005355~glucose transmembrane transporter activity	3	0.0124714	17.3747
GOTERM_BP_DIRECT	GO:0030335~positive regulation of cell migration	9	0.00525673	3.38484		GOTERM_CC_DIRECT	GO:0005610~laminin-5 complex	2	0.029168	67.5644		GOTERM_MF_DIRECT	GO:0015108~chloride transmembrane transporter activity	3	0.0140353	16.3527
GOTERM_BP_DIRECT	GO:0098911~regulation of ventricular cardiac muscle cell action potential	3	0.00549676	26.2582		GOTERM_CC_DIRECT	GO:0034683~integrin alphav-beta3 complex	2	0.029168	67.5644		GOTERM_MF_DIRECT	GO:0008392~arachidonic acid epoxygenase activity	3	0.0140353	16.3527
GOTERM_BP_DIRECT	GO:0097186~amelogenesis	3	0.00655146	24.07		GOTERM_CC_DIRECT	GO:0035868~alphav-beta3 integrin-HMGB1 complex	2	0.029168	67.5644		GOTERM_MF_DIRECT	GO:0008028~monocarboxylic acid transmembrane transporter activity	3	0.0140353	16.3527
GOTERM_BP_DIRECT	GO:0051693~actin filament capping	3	0.00655146	24.07		GOTERM_CC_DIRECT	GO:0008305~integrin complex	3	0.0306708	10.8586		GOTERM_MF_DIRECT	GO:0015151~alpha-glucoside transmembrane transporter activity	2	0.021362	92.665
GOTERM_BP_DIRECT	GO:0016477~cell migration	9	0.00686729	3.23328		GOTERM_CC_DIRECT	GO:0005829~cytosol	67	0.0321209	1.23977		GOTERM_MF_DIRECT	GO:0017153~sodium:dicarboxylate symporter activity	2	0.021362	92.665
GOTERM_BP_DIRECT	GO:0042127~regulation of cell proliferation	7	0.00723632	4.10951		GOTERM_CC_DIRECT	GO:1904813~ficolin-1-rich granule lumen	5	0.0340446	4.08655		GOTERM_MF_DIRECT	GO:0005080~protein kinase C binding	4	0.0233546	6.50281
GOTERM_BP_DIRECT	GO:0010745~negative regulation of macrophage derived foam cell differentiation	3	0.00769026	22.2185		GOTERM_CC_DIRECT	GO:0002102~podosome	3	0.0348493	10.1347		GOTERM_MF_DIRECT	GO:0030170~pyridoxal phosphate binding	4	0.0244385	6.39069
GOTERM_BP_DIRECT	GO:0032026~response to magnesium ion	3	0.00769026	22.2185		GOTERM_CC_DIRECT	GO:0030659~cytoplasmic vesicle membrane	5	0.0384968	3.92816		GOTERM_MF_DIRECT	GO:0017134~fibroblast growth factor binding	3	0.025035	12.0867
GOTERM_BP_DIRECT	GO:0031424~keratinization	5	0.00832678	6.25195		GOTERM_CC_DIRECT	GO:0035867~alphav-beta3 integrin-IGF-1-IGF1R complex	2	0.0387013	50.6733		GOTERM_MF_DIRECT	GO:0005200~structural constituent of cytoskeleton	5	0.0282982	4.33014
GOTERM_BP_DIRECT	GO:0089718~amino acid import across plasma membrane	3	0.00891132	20.6314		GOTERM_CC_DIRECT	GO:0044853~plasma membrane raft	3	0.0438165	8.94234		GOTERM_MF_DIRECT	GO:0008511~sodium:potassium:chloride symporter activity	2	0.0318722	61.7767
GOTERM_BP_DIRECT	GO:0097284~hepatocyte apoptotic process	3	0.00891132	20.6314		GOTERM_CC_DIRECT	GO:0098793~presynapse	5	0.0526543	3.54359		GOTERM_MF_DIRECT	GO:0044877~macromolecular complex binding	10	0.0352638	2.23829
GOTERM_BP_DIRECT	GO:1990573~potassium ion import across plasma membrane	4	0.0112183	8.55822		GOTERM_CC_DIRECT	GO:0016020~membrane	34	0.057798	1.35288		GOTERM_MF_DIRECT	GO:0097110~scaffold protein binding	4	0.03812	5.37189
GOTERM_BP_DIRECT	GO:0032966~negative regulation of collagen biosynthetic process	3	0.0115931	18.0525		GOTERM_CC_DIRECT	GO:0043235~receptor complex	6	0.0633268	2.80221		GOTERM_MF_DIRECT	GO:0008237~metallopeptidase activity	4	0.0409495	5.22056
GOTERM_BP_DIRECT	GO:0022617~extracellular matrix disassembly	4	0.0119112	8.37217		GOTERM_CC_DIRECT	GO:0005604~basement membrane	4	0.0653599	4.31262		GOTERM_MF_DIRECT	GO:0015137~citrate transmembrane transporter activity	2	0.04227	46.3325
GOTERM_BP_DIRECT	GO:0015711~organic anion transport	3	0.0161885	15.2021		GOTERM_CC_DIRECT	GO:0030056~hemidesmosome	2	0.0667459	28.9562		GOTERM_MF_DIRECT	GO:0015377~cation:chloride symporter activity	2	0.04227	46.3325
GOTERM_BP_DIRECT	GO:0006631~fatty acid metabolic process	5	0.016986	5.06737		GOTERM_CC_DIRECT	GO:0032587~ruffle membrane	4	0.073868	4.09481		GOTERM_MF_DIRECT	GO:0050840~extracellular matrix binding	3	0.0435202	8.96758
GOTERM_BP_DIRECT	GO:0019373~epoxygenase P450 pathway	3	0.0178663	14.442		GOTERM_CC_DIRECT	GO:0043229~intracellular organelle	2	0.075912	25.3366		GOTERM_MF_DIRECT	GO:0043621~protein self-association	4	0.0453867	5.00892
GOTERM_BP_DIRECT	GO:0031667~response to nutrient levels	4	0.0192445	7.00218		GOTERM_CC_DIRECT	GO:0001726~ruffle	4	0.0774027	4.01372		GOTERM_MF_DIRECT	GO:0001618~virus receptor activity	4	0.048472	4.87711
GOTERM_BP_DIRECT	GO:0016338~calcium-independent cell-cell adhesion via plasma membrane cell-adhesion molecules	3	0.0196143	13.7543		GOTERM_CC_DIRECT	GO:0005938~cell cortex	5	0.0784932	3.08983		GOTERM_MF_DIRECT	GO:0070051~fibrinogen binding	2	0.0525566	37.066
GOTERM_BP_DIRECT	GO:1903923~positive regulation of protein processing in phagocytic vesicle	2	0.0205626	96.28		GOTERM_CC_DIRECT	GO:0043005~neuron projection	8	0.0808744	2.13924		GOTERM_MF_DIRECT	GO:0019960~C-X3-C chemokine binding	2	0.0525566	37.066
GOTERM_BP_DIRECT	GO:0000017~alpha-glucoside transport	2	0.0205626	96.28		GOTERM_CC_DIRECT	GO:0031232~extrinsic component of external side of plasma membrane	2	0.0849885	22.5215		GOTERM_MF_DIRECT	GO:0005332~gamma-aminobutyric acid:sodium symporter activity	2	0.0525566	37.066
GOTERM_BP_DIRECT	GO:0050748~negative regulation of lipoprotein metabolic process	2	0.0205626	96.28		GOTERM_CC_DIRECT	GO:0005768~endosome	7	0.0930937	2.23794		GOTERM_MF_DIRECT	GO:0034634~glutathione transmembrane transporter activity	2	0.0525566	37.066
GOTERM_BP_DIRECT	GO:0046724~oxalic acid secretion	2	0.0205626	96.28		GOTERM_CC_DIRECT	GO:0005916~fascia adherens	2	0.0939763	20.2693		GOTERM_MF_DIRECT	GO:0004888~transmembrane signaling receptor activity	6	0.0532966	2.94175
GOTERM_BP_DIRECT	GO:0045780~positive regulation of bone resorption	3	0.0214308	13.1291								GOTERM_MF_DIRECT	GO:0005201~extracellular matrix structural constituent	5	0.0616911	3.35743
GOTERM_BP_DIRECT	GO:0034446~substrate adhesion-dependent cell spreading	4	0.0221332	6.64								GOTERM_MF_DIRECT	GO:0015081~sodium ion transmembrane transporter activity	2	0.0627334	30.8883
GOTERM_BP_DIRECT	GO:0016125~sterol metabolic process	3	0.0233144	12.5583								GOTERM_MF_DIRECT	GO:0015129~lactate transmembrane transporter activity	2	0.0627334	30.8883
GOTERM_BP_DIRECT	GO:0007160~cell-matrix adhesion	5	0.0250517	4.49907								GOTERM_MF_DIRECT	GO:0015141~succinate transmembrane transporter activity	2	0.0728013	26.4757
GOTERM_BP_DIRECT	GO:0030155~regulation of cell adhesion	4	0.0252453	6.31344								GOTERM_MF_DIRECT	GO:0005412~glucose:sodium symporter activity	2	0.0728013	26.4757
GOTERM_BP_DIRECT	GO:1904659~glucose transmembrane transport	3	0.0252635	12.035								GOTERM_MF_DIRECT	GO:0015026~coreceptor activity	3	0.0746915	6.61893
GOTERM_BP_DIRECT	GO:0072659~protein localization to plasma membrane	6	0.0260576	3.58807								GOTERM_MF_DIRECT	GO:0015431~glutathione S-conjugate-exporting ATPase activity	2	0.0827617	23.1663
GOTERM_BP_DIRECT	GO:0006508~proteolysis	10	0.0266218	2.35403								GOTERM_MF_DIRECT	GO:0061459~L-arginine transmembrane transporter activity	2	0.0827617	23.1663
GOTERM_BP_DIRECT	GO:0017144~drug metabolic process	3	0.0272764	11.5536								GOTERM_MF_DIRECT	GO:0015379~potassium:chloride symporter activity	2	0.0926155	20.5922
GOTERM_BP_DIRECT	GO:0009612~response to mechanical stimulus	4	0.027444	6.11302
GOTERM_BP_DIRECT	GO:0006857~oligopeptide transport	2	0.0306856	64.1867
GOTERM_BP_DIRECT	GO:0042853~L-alanine catabolic process	2	0.0306856	64.1867
GOTERM_BP_DIRECT	GO:0070165~positive regulation of adiponectin secretion	2	0.0306856	64.1867
GOTERM_BP_DIRECT	GO:1902373~negative regulation of mRNA catabolic process	2	0.0306856	64.1867
GOTERM_BP_DIRECT	GO:0015746~citrate transport	2	0.0306856	64.1867
GOTERM_BP_DIRECT	GO:0035623~renal glucose absorption	2	0.0306856	64.1867
GOTERM_BP_DIRECT	GO:0090303~positive regulation of wound healing	3	0.031488	10.6978
GOTERM_BP_DIRECT	GO:0001954~positive regulation of cell-matrix adhesion	3	0.0336837	10.3157
GOTERM_BP_DIRECT	GO:0034113~heterotypic cell-cell adhesion	3	0.0359374	9.96
GOTERM_BP_DIRECT	GO:0051453~regulation of intracellular pH	3	0.0359374	9.96
GOTERM_BP_DIRECT	GO:0015701~bicarbonate transport	3	0.0359374	9.96
GOTERM_BP_DIRECT	GO:0007520~myoblast fusion	3	0.0359374	9.96
GOTERM_BP_DIRECT	GO:0018105~peptidyl-serine phosphorylation	6	0.0400559	3.1916
GOTERM_BP_DIRECT	GO:0035987~endodermal cell differentiation	3	0.040613	9.31742
GOTERM_BP_DIRECT	GO:0019058~viral life cycle	2	0.0407045	48.14
GOTERM_BP_DIRECT	GO:0001951~intestinal D-glucose absorption	2	0.0407045	48.14
GOTERM_BP_DIRECT	GO:0051936~gamma-aminobutyric acid reuptake	2	0.0407045	48.14
GOTERM_BP_DIRECT	GO:0015879~carnitine transport	2	0.0407045	48.14
GOTERM_BP_DIRECT	GO:0002159~desmosome assembly	2	0.0407045	48.14
GOTERM_BP_DIRECT	GO:0032369~negative regulation of lipid transport	2	0.0407045	48.14
GOTERM_BP_DIRECT	GO:1905050~positive regulation of metallopeptidase activity	2	0.0407045	48.14
GOTERM_BP_DIRECT	GO:0035873~lactate transmembrane transport	2	0.0407045	48.14
GOTERM_BP_DIRECT	GO:0050873~brown fat cell differentiation	3	0.0480267	8.49529
GOTERM_BP_DIRECT	GO:2000379~positive regulation of reactive oxygen species metabolic process	3	0.0505993	8.25257
GOTERM_BP_DIRECT	GO:0009888~tissue development	3	0.0505993	8.25257
GOTERM_BP_DIRECT	GO:0071332~cellular response to fructose stimulus	2	0.0506203	38.512
GOTERM_BP_DIRECT	GO:0044070~regulation of anion transport	2	0.0506203	38.512
GOTERM_BP_DIRECT	GO:0098708~glucose import across plasma membrane	2	0.0506203	38.512
GOTERM_BP_DIRECT	GO:0033031~positive regulation of neutrophil apoptotic process	2	0.0506203	38.512
GOTERM_BP_DIRECT	GO:0097638~L-arginine import across plasma membrane	2	0.0506203	38.512
GOTERM_BP_DIRECT	GO:0046222~aflatoxin metabolic process	2	0.0506203	38.512
GOTERM_BP_DIRECT	GO:0071681~cellular response to indole-3-methanol	2	0.0506203	38.512
GOTERM_BP_DIRECT	GO:0006919~activation of cysteine-type endopeptidase activity involved in apoptotic process	4	0.0531792	4.69659
GOTERM_BP_DIRECT	GO:0007015~actin filament organization	5	0.0551123	3.48841
GOTERM_BP_DIRECT	GO:0071456~cellular response to hypoxia	5	0.0575148	3.43857
GOTERM_BP_DIRECT	GO:0001503~ossification	4	0.0580167	4.53082
GOTERM_BP_DIRECT	GO:0044206~UMP salvage	2	0.0604342	32.0933
GOTERM_BP_DIRECT	GO:0034775~glutathione transmembrane transport	2	0.0604342	32.0933
GOTERM_BP_DIRECT	GO:0031581~hemidesmosome assembly	2	0.0604342	32.0933
GOTERM_BP_DIRECT	GO:0038027~apolipoprotein A-I-mediated signaling pathway	2	0.0604342	32.0933
GOTERM_BP_DIRECT	GO:1990962~drug transport across blood-brain barrier	2	0.0604342	32.0933
GOTERM_BP_DIRECT	GO:0002934~desmosome organization	2	0.0604342	32.0933
GOTERM_BP_DIRECT	GO:0051127~positive regulation of actin nucleation	2	0.0604342	32.0933
GOTERM_BP_DIRECT	GO:0051546~keratinocyte migration	2	0.0604342	32.0933
GOTERM_BP_DIRECT	GO:0098742~cell-cell adhesion via plasma-membrane adhesion molecules	3	0.0613624	7.40615
GOTERM_BP_DIRECT	GO:0006936~muscle contraction	4	0.0630546	4.37636
GOTERM_BP_DIRECT	GO:0043537~negative regulation of blood vessel endothelial cell migration	3	0.0641651	7.221
GOTERM_BP_DIRECT	GO:0033627~cell adhesion mediated by integrin	3	0.0641651	7.221
GOTERM_BP_DIRECT	GO:0001934~positive regulation of protein phosphorylation	6	0.0660981	2.76402
GOTERM_BP_DIRECT	GO:0030574~collagen catabolic process	3	0.0670103	7.04488
GOTERM_BP_DIRECT	GO:0006865~amino acid transport	3	0.0670103	7.04488
GOTERM_BP_DIRECT	GO:0007601~visual perception	6	0.0683654	2.73782
GOTERM_BP_DIRECT	GO:0086091~regulation of heart rate by cardiac conduction	3	0.0698967	6.87714
GOTERM_BP_DIRECT	GO:0061025~membrane fusion	3	0.0698967	6.87714
GOTERM_BP_DIRECT	GO:0003223~ventricular compact myocardium morphogenesis	2	0.0701471	27.5086
GOTERM_BP_DIRECT	GO:0006548~histidine catabolic process	2	0.0701471	27.5086
GOTERM_BP_DIRECT	GO:1905598~negative regulation of low-density lipoprotein receptor activity	2	0.0701471	27.5086
GOTERM_BP_DIRECT	GO:0002933~lipid hydroxylation	2	0.0701471	27.5086
GOTERM_BP_DIRECT	GO:0071716~leukotriene transport	2	0.0701471	27.5086
GOTERM_BP_DIRECT	GO:0009804~coumarin metabolic process	2	0.0701471	27.5086
GOTERM_BP_DIRECT	GO:0071422~succinate transmembrane transport	2	0.0701471	27.5086
GOTERM_BP_DIRECT	GO:0007566~embryo implantation	3	0.0728231	6.71721
GOTERM_BP_DIRECT	GO:0032411~positive regulation of transporter activity	2	0.0797601	24.07
GOTERM_BP_DIRECT	GO:0015889~cobalamin transport	2	0.0797601	24.07
GOTERM_BP_DIRECT	GO:0070293~renal absorption	2	0.0797601	24.07
GOTERM_BP_DIRECT	GO:0007605~sensory perception of sound	5	0.0822699	3.02767
GOTERM_BP_DIRECT	GO:0046718~viral entry into host cell	4	0.0870841	3.81307
GOTERM_BP_DIRECT	GO:1903243~negative regulation of cardiac muscle hypertrophy in response to stress	2	0.0892742	21.3956
GOTERM_BP_DIRECT	GO:0045766~positive regulation of angiogenesis	5	0.0905733	2.93537
GOTERM_BP_DIRECT	GO:0030198~extracellular matrix organization	5	0.0921086	2.91758
GOTERM_BP_DIRECT	GO:0070830~bicellular tight junction assembly	3	0.0975465	5.66353
GOTERM_BP_DIRECT	GO:0060452~positive regulation of cardiac muscle contraction	2	0.0986905	19.256
GOTERM_BP_DIRECT	GO:0019532~oxalate transport	2	0.0986905	19.256
GOTERM_BP_DIRECT	GO:0003334~keratinocyte development	2	0.0986905	19.256
GOTERM_BP_DIRECT	GO:0015695~organic cation transport	2	0.0986905	19.256
GOTERM_BP_DIRECT	GO:0030643~cellular phosphate ion homeostasis	2	0.0986905	19.256
GOTERM_BP_DIRECT	GO:0006817~phosphate ion transport	2	0.0986905	19.256
