# Supplementary material for: Role of glucocorticoid and mineralocorticoid receptors in rainbow trout (Oncorhynchus mykiss) skeletal muscle: A transcriptomic perspective of cortisol action
Source: Front Physiol. 2023 Jan 6;13:1048008. doi: 10.3389/fphys.2022.1048008 (PMC9852899; doi:10.3389/fphys.2022.1048008)
Supplement: Supplementary file 3 [file Table9.XLSX]

## Sheet: BP
Category	Term	Count	PValue	Fold Enrichment		Category	Term	Count	PValue	Fold Enrichment		Category	Term	Count	PValue	Fold Enrichment		Category	Term	Count	PValue	Fold Enrichment
GOTERM_BP_DIRECT	GO:0006954~inflammatory response	8	0.00673923	3.58029		GOTERM_CC_DIRECT	GO:0070062~extracellular exosome	30	0.00057701	1.88828		GOTERM_MF_DIRECT	GO:0051087~chaperone binding	6	0.000102431	12.7596		KEGG_PATHWAY	hsa04670:Leukocyte transendothelial migration	6	0.000687461	8.25506
GOTERM_BP_DIRECT	GO:0033031~positive regulation of neutrophil apoptotic process	2	0.0116385	169.616		GOTERM_CC_DIRECT	GO:0072562~blood microparticle	6	0.00164406	6.98416		GOTERM_MF_DIRECT	GO:0020037~heme binding	5	0.00803884	6.28668		KEGG_PATHWAY	hsa04613:Neutrophil extracellular trap formation	7	0.00111233	5.77854
GOTERM_BP_DIRECT	GO:0042771~intrinsic apoptotic signaling pathway in response to DNA damage by p53 class mediator	3	0.0140433	16.4145		GOTERM_CC_DIRECT	GO:0005615~extracellular space	16	0.00786587	2.10164		GOTERM_MF_DIRECT	GO:0005198~structural molecule activity	6	0.013965	4.18433		KEGG_PATHWAY	hsa05140:Leishmaniasis	5	0.00131137	10.1848
GOTERM_BP_DIRECT	GO:0008152~metabolic process	5	0.0168777	5.0481		GOTERM_CC_DIRECT	GO:0009986~cell surface	9	0.0110976	2.93799		GOTERM_MF_DIRECT	GO:0004252~serine-type endopeptidase activity	6	0.0158264	4.05306		KEGG_PATHWAY	hsa05417:Lipid and atherosclerosis	6	0.0106639	4.3771
GOTERM_BP_DIRECT	GO:1902476~chloride transmembrane transport	4	0.0171315	7.29532		GOTERM_CC_DIRECT	GO:0016324~apical plasma membrane	6	0.0238361	3.64808		GOTERM_MF_DIRECT	GO:0004222~metalloendopeptidase activity	4	0.0273412	6.09753		KEGG_PATHWAY	hsa04145:Phagosome	5	0.0147035	5.15941
GOTERM_BP_DIRECT	GO:0050714~positive regulation of protein secretion	3	0.0186714	14.1347		GOTERM_CC_DIRECT	GO:0016020~membrane	20	0.0352794	1.60847		GOTERM_MF_DIRECT	GO:0030911~TPR domain binding	2	0.0284056	68.902		KEGG_PATHWAY	hsa04610:Complement and coagulation cascades	4	0.0158793	7.381
GOTERM_BP_DIRECT	GO:0055114~oxidation-reduction process	9	0.0223811	2.57862		GOTERM_CC_DIRECT	GO:0005778~peroxisomal membrane	3	0.0367639	9.82956		GOTERM_MF_DIRECT	GO:0005254~chloride channel activity	3	0.038544	9.56973		KEGG_PATHWAY	hsa05150:Staphylococcus aureus infection	4	0.0218995	6.53526
GOTERM_BP_DIRECT	GO:0045920~negative regulation of exocytosis	2	0.0231429	84.8081		GOTERM_CC_DIRECT	GO:0031093~platelet alpha granule lumen	3	0.0380148	9.65084		GOTERM_MF_DIRECT	GO:0016494~C-X-C chemokine receptor activity	2	0.0395429	49.2157		KEGG_PATHWAY	hsa04960:Aldosterone-regulated sodium reabsorption	3	0.022209	12.7173
GOTERM_BP_DIRECT	GO:0072378~blood coagulation, fibrin clot formation	2	0.0231429	84.8081		GOTERM_CC_DIRECT	GO:0005577~fibrinogen complex	2	0.0492706	39.3182		GOTERM_MF_DIRECT	GO:0005102~receptor binding	6	0.0527941	2.92785		KEGG_PATHWAY	hsa04216:Ferroptosis	3	0.0269155	11.4765
GOTERM_BP_DIRECT	GO:0006508~proteolysis	8	0.0270118	2.71386		GOTERM_CC_DIRECT	GO:0005789~endoplasmic reticulum membrane	10	0.0522732	2.05258		GOTERM_MF_DIRECT	GO:0001948~glycoprotein binding	3	0.053811	7.95024		KEGG_PATHWAY	hsa05020:Prion disease	6	0.027144	3.44717
GOTERM_BP_DIRECT	GO:0045766~positive regulation of angiogenesis	4	0.0297555	5.89969		GOTERM_CC_DIRECT	GO:0043020~NADPH oxidase complex	2	0.0651538	29.4887		GOTERM_MF_DIRECT	GO:0016175~superoxide-generating NADPH oxidase activity	2	0.0614398	31.3191		KEGG_PATHWAY	hsa00860:Porphyrin metabolism	3	0.0294068	10.9428
GOTERM_BP_DIRECT	GO:0034220~ion transmembrane transport	5	0.0345638	4.03848		GOTERM_CC_DIRECT	GO:0005739~mitochondrion	13	0.0681269	1.72811		GOTERM_MF_DIRECT	GO:0030674~protein binding, bridging	3	0.0724576	6.71124		KEGG_PATHWAY	hsa05134:Legionellosis	3	0.0491904	8.25506
GOTERM_BP_DIRECT	GO:0051592~response to calcium ion	3	0.0451171	8.77325		GOTERM_CC_DIRECT	GO:0031091~platelet alpha granule	2	0.0755963	25.276		GOTERM_MF_DIRECT	GO:0003697~single-stranded DNA binding	3	0.0999742	5.55662		KEGG_PATHWAY	hsa04915:Estrogen signaling pathway	4	0.0547985	4.54627
GOTERM_BP_DIRECT	GO:0090277~positive regulation of peptide hormone secretion	2	0.0457556	42.404		GOTERM_CC_DIRECT	GO:0019898~extrinsic component of membrane	3	0.0772222	6.47312								KEGG_PATHWAY	hsa05418:Fluid shear stress and atherosclerosis	4	0.0557675	4.51356
GOTERM_BP_DIRECT	GO:0034101~erythrocyte homeostasis	2	0.0513273	37.6925		GOTERM_CC_DIRECT	GO:0031090~organelle membrane	3	0.0854645	6.1011								KEGG_PATHWAY	hsa05171:Coronavirus disease - COVID-19	5	0.0563567	3.38031
GOTERM_BP_DIRECT	GO:0006782~protoporphyrinogen IX biosynthetic process	2	0.0513273	37.6925		GOTERM_CC_DIRECT	GO:0016234~inclusion body	2	0.0961362	19.6591								KEGG_PATHWAY	hsa03320:PPAR signaling pathway	3	0.0797238	6.27385
GOTERM_BP_DIRECT	GO:0031639~plasminogen activation	2	0.0513273	37.6925
GOTERM_BP_DIRECT	GO:0030574~collagen catabolic process	3	0.0538106	7.95076
GOTERM_BP_DIRECT	GO:0002250~adaptive immune response	4	0.0557037	4.58422
GOTERM_BP_DIRECT	GO:0090084~negative regulation of inclusion body assembly	2	0.0568669	33.9232
GOTERM_BP_DIRECT	GO:0044070~regulation of anion transport	2	0.0568669	33.9232
GOTERM_BP_DIRECT	GO:0034116~positive regulation of heterotypic cell-cell adhesion	2	0.0623744	30.8393
GOTERM_BP_DIRECT	GO:0008283~cell proliferation	6	0.0630942	2.78059
GOTERM_BP_DIRECT	GO:0070098~chemokine-mediated signaling pathway	3	0.0646297	7.16688
GOTERM_BP_DIRECT	GO:0030277~maintenance of gastrointestinal epithelium	2	0.0678501	28.2694
GOTERM_BP_DIRECT	GO:0022617~extracellular matrix disassembly	3	0.072765	6.69537
GOTERM_BP_DIRECT	GO:0051258~protein polymerization	2	0.0732941	26.0948
GOTERM_BP_DIRECT	GO:0045730~respiratory burst	2	0.0732941	26.0948
GOTERM_BP_DIRECT	GO:0042554~superoxide anion generation	2	0.0787066	24.2309
GOTERM_BP_DIRECT	GO:0001666~response to hypoxia	4	0.0795105	3.94456
GOTERM_BP_DIRECT	GO:0043085~positive regulation of catalytic activity	3	0.0812109	6.28208
GOTERM_BP_DIRECT	GO:0006457~protein folding	4	0.0882874	3.76925
GOTERM_BP_DIRECT	GO:0031396~regulation of protein ubiquitination	2	0.089438	21.202
GOTERM_BP_DIRECT	GO:1901216~positive regulation of neuron death	2	0.0947572	19.9548
GOTERM_BP_DIRECT	GO:0002407~dendritic cell chemotaxis	2	0.0947572	19.9548

## Sheet: CC
Category	Term	Count	%	PValue	Genes	List Total	Pop Hits	Pop Total	Fold Enrichment	Bonferroni	Benjamini	FDR
GOTERM_CC_DIRECT	GO:0070062~extracellular exosome	30	27.5229	0.00057701	SERPINA3, FKBP2, ITGAM, HSP90AB1, CXCR4, SLC1A4, EPX, C3, TUBA1B, SAMM50, RAB8B, FGB, SLC12A3, ANXA1, PRKCB, FGG, HUWE1, ACSL4, PDZK1, HSPE1, CP, MMP9, EIF2S1, KLK11, EML5, GPR180, KRT16, ARMC3, MYO5B, SDC1	103	2811	18224	1.88828	0.0882124	0.0923216	0.0923216
GOTERM_CC_DIRECT	GO:0072562~blood microparticle	6	5.50459	0.00164406	FGB, C3, SERPINA3, FGG, CP, HSPA1B	103	152	18224	6.98416	0.231462	0.131525	0.131525
GOTERM_CC_DIRECT	GO:0005615~extracellular space	16	14.6789	0.00786587	FGB, SERPINA3, CPA1, ITGAM, ANXA1, FGG, CLCA3P, STC1, PRSS57, EPX, CP, MMP9, KLK11, MMP20, C3, MMP13	103	1347	18224	2.10164	0.717341	0.419513	0.419513
GOTERM_CC_DIRECT	GO:0009986~cell surface	9	8.25688	0.0110976	FGB, ITGAM, ANXA1, HSP90AB1, FGG, CXCR2, CXCR4, SDC1, SLC1A4	103	542	18224	2.93799	0.832294	0.443904	0.443904
GOTERM_CC_DIRECT	GO:0016324~apical plasma membrane	6	5.50459	0.0238361	SLC12A3, ANXA1, HSP90AB1, MAL, STC1, PDZK1	103	291	18224	3.64808	0.978931	0.760295	0.760295
GOTERM_CC_DIRECT	GO:0016020~membrane	20	18.3486	0.0352794	GTF3C1, SLC12A3, HSP90AB1, CSGALNACT2, HUWE1, ACSL4, SLC1A4, KCNAB2, HSPE1, EIF2S1, RERG, NECAP2, ALOX5AP, CXCR2, SDC1, TACC1, ASCC3, DNM1L, CNOT9, GCNT7	103	2200	18224	1.60847	0.996807	0.760295	0.760295
GOTERM_CC_DIRECT	GO:0005778~peroxisomal membrane	3	2.75229	0.0367639	FNDC5, ACSL4, RAB8B	103	54	18224	9.82956	0.997504	0.760295	0.760295
GOTERM_CC_DIRECT	GO:0031093~platelet alpha granule lumen	3	2.75229	0.0380148	FGB, SERPINA3, FGG	103	55	18224	9.65084	0.997973	0.760295	0.760295
GOTERM_CC_DIRECT	GO:0005577~fibrinogen complex	2	1.83486	0.0492706	FGB, FGG	103	9	18224	39.3182	0.999692	0.836372	0.836372
GOTERM_CC_DIRECT	GO:0005789~endoplasmic reticulum membrane	10	9.17431	0.0522732	FKBP2, CYP2A13, INSIG1, ALOX5AP, CYBB, ACSL4, DNM1L, SGK1, CYP7A1, CYP8B1	103	862	18224	2.05258	0.999814	0.836372	0.836372
GOTERM_CC_DIRECT	GO:0043020~NADPH oxidase complex	2	1.83486	0.0651538	NCF1, CYBB	103	12	18224	29.4887	0.999979	0.882539	0.882539
GOTERM_CC_DIRECT	GO:0005739~mitochondrion	13	11.9266	0.0681269	HSP90AB1, IREB2, CYBB, TIMM44, HSPE1, SAMM50, ENOSF1, DDIT4, SACS, DNM1L, SGK1, HSPA1B, RAB8B	103	1331	18224	1.72811	0.999987	0.882539	0.882539
GOTERM_CC_DIRECT	GO:0031091~platelet alpha granule	2	1.83486	0.0755963	FGB, FGG	103	14	18224	25.276	0.999997	0.882539	0.882539
GOTERM_CC_DIRECT	GO:0019898~extrinsic component of membrane	3	2.75229	0.0772222	ANXA1, NCF1, MAL	103	82	18224	6.47312	0.999997	0.882539	0.882539
GOTERM_CC_DIRECT	GO:0031090~organelle membrane	3	2.75229	0.0854645	CYP2A13, CYP7A1, CYP8B1	103	87	18224	6.1011	0.999999	0.911621	0.911621
GOTERM_CC_DIRECT	GO:0016234~inclusion body	2	1.83486	0.0961362	HSP90AB1, HSPA1B	103	18	18224	19.6591	1	0.946933	0.946933

## Sheet: MF
Category	Term	Count	%	PValue	Genes	List Total	Pop Hits	Pop Total	Fold Enrichment	Bonferroni	Benjamini	FDR
GOTERM_MF_DIRECT	GO:0051087~chaperone binding	6	5.50459	0.000102431	FGB, SACS, ATP1A3, TIMM44, HSPE1, CP	98	81	16881	12.7596	0.0247847	0.0250957	0.0250957
GOTERM_MF_DIRECT	GO:0020037~heme binding	5	4.58716	0.00803884	CYP2A13, CYBB, EPX, CYP7A1, CYP8B1	98	137	16881	6.28668	0.861582	0.969369	0.969369
GOTERM_MF_DIRECT	GO:0005198~structural molecule activity	6	5.50459	0.013965	FGB, TUBA1B, ANXA1, KRT16, FGG, TLN2	98	247	16881	4.18433	0.968113	0.969369	0.969369
GOTERM_MF_DIRECT	GO:0004252~serine-type endopeptidase activity	6	5.50459	0.0158264	C3, MMP13, PRSS57, MMP9, KLK11, MMP20	98	255	16881	4.05306	0.979929	0.969369	0.969369
GOTERM_MF_DIRECT	GO:0004222~metalloendopeptidase activity	4	3.66972	0.0273412	MMP13, CLCA3P, MMP9, MMP20	98	113	16881	6.09753	0.998877	1	1
GOTERM_MF_DIRECT	GO:0030911~TPR domain binding	2	1.83486	0.0284056	HSP90AB1, RAB8B	98	5	16881	68.902	0.999141	1	1
GOTERM_MF_DIRECT	GO:0005254~chloride channel activity	3	2.75229	0.038544	GABRQ, CLCA3P, SLC1A4	98	54	16881	9.56973	0.999934	1	1
GOTERM_MF_DIRECT	GO:0016494~C-X-C chemokine receptor activity	2	1.83486	0.0395429	CXCR2, CXCR4	98	7	16881	49.2157	0.999949	1	1
GOTERM_MF_DIRECT	GO:0005102~receptor binding	6	5.50459	0.0527941	FGB, C3, ANXA1, FGG, HSPA1B, RAB8B	98	353	16881	2.92785	0.999998	1	1
GOTERM_MF_DIRECT	GO:0001948~glycoprotein binding	3	2.75229	0.053811	ITGAM, HSP90AB1, SDC1	98	65	16881	7.95024	0.999999	1	1
GOTERM_MF_DIRECT	GO:0016175~superoxide-generating NADPH oxidase activity	2	1.83486	0.0614398	NCF1, CYBB	98	11	16881	31.3191	1	1	1
GOTERM_MF_DIRECT	GO:0030674~protein binding, bridging	3	2.75229	0.0724576	FGB, ANXA1, FGG	98	77	16881	6.71124	1	1	1
GOTERM_MF_DIRECT	GO:0003697~single-stranded DNA binding	3	2.75229	0.0999742	ANXA1, RTF1, BRCA2	98	93	16881	5.55662	1	1	1

## Sheet: KEGG
Category	Term	Count	%	PValue	Genes	List Total	Pop Hits	Pop Total	Fold Enrichment	Bonferroni	Benjamini	FDR
KEGG_PATHWAY	hsa04670:Leukocyte transendothelial migration	6	5.30973	0.000687461	ITGAM, NCF1, PRKCB, CYBB, CXCR4, MMP9	52	114	8156	8.25506	0.119464	0.0808675	0.0804304
KEGG_PATHWAY	hsa04613:Neutrophil extracellular trap formation	7	6.19469	0.00111233	FGB, C3, ITGAM, NCF1, PRKCB, FGG, CYBB	52	190	8156	5.77854	0.186083	0.0808675	0.0804304
KEGG_PATHWAY	hsa05140:Leishmaniasis	5	4.42478	0.00131137	C3, ITGAM, NCF1, PRKCB, CYBB	52	77	8156	10.1848	0.215542	0.0808675	0.0804304
KEGG_PATHWAY	hsa05417:Lipid and atherosclerosis	6	5.30973	0.0106639	HSP90AB1, NCF1, CYBB, EIF2S1, MMP9, HSPA1B	52	215	8156	4.3771	0.862403	0.489611	0.486964
KEGG_PATHWAY	hsa04145:Phagosome	5	4.42478	0.0147035	C3, TUBA1B, ITGAM, NCF1, CYBB	52	152	8156	5.15941	0.935452	0.489611	0.486964
KEGG_PATHWAY	hsa04610:Complement and coagulation cascades	4	3.53982	0.0158793	FGB, C3, ITGAM, FGG	52	85	8156	7.381	0.948245	0.489611	0.486964
KEGG_PATHWAY	hsa05150:Staphylococcus aureus infection	4	3.53982	0.0218995	C3, ITGAM, KRT16, FGG	52	96	8156	6.53526	0.983368	0.49457	0.491896
KEGG_PATHWAY	hsa04960:Aldosterone-regulated sodium reabsorption	3	2.65487	0.022209	PRKCB, ATP1A3, SGK1	52	37	8156	12.7173	0.984314	0.49457	0.491896
KEGG_PATHWAY	hsa04216:Ferroptosis	3	2.65487	0.0269155	CYBB, ACSL4, CP	52	41	8156	11.4765	0.993575	0.49457	0.491896
KEGG_PATHWAY	hsa05020:Prion disease	6	5.30973	0.027144	TUBA1B, NCF1, CYBB, NCAM2, EIF2S1, HSPA1B	52	273	8156	3.44717	0.993848	0.49457	0.491896
KEGG_PATHWAY	hsa00860:Porphyrin metabolism	3	2.65487	0.0294068	UROD, UGT2A1, CP	52	43	8156	10.9428	0.996002	0.49457	0.491896
KEGG_PATHWAY	hsa05134:Legionellosis	3	2.65487	0.0491904	C3, ITGAM, HSPA1B	52	57	8156	8.25506	0.999911	0.695066	0.691309
KEGG_PATHWAY	hsa04915:Estrogen signaling pathway	4	3.53982	0.0547985	HSP90AB1, KRT16, MMP9, HSPA1B	52	138	8156	4.54627	0.99997	0.695066	0.691309
KEGG_PATHWAY	hsa05418:Fluid shear stress and atherosclerosis	4	3.53982	0.0557675	HSP90AB1, NCF1, SDC1, MMP9	52	139	8156	4.51356	0.999975	0.695066	0.691309
KEGG_PATHWAY	hsa05171:Coronavirus disease - COVID-19	5	4.42478	0.0563567	FGB, C3, PRKCB, FGG, CYBB	52	232	8156	3.38031	0.999978	0.695066	0.691309
KEGG_PATHWAY	hsa03320:PPAR signaling pathway	3	2.65487	0.0797238	ACSL4, CYP7A1, CYP8B1	52	75	8156	6.27385	1	0.921806	0.916823
