# Supplementary material for: Role of glucocorticoid and mineralocorticoid receptors in rainbow trout (Oncorhynchus mykiss) skeletal muscle: A transcriptomic perspective of cortisol action
Source: Front Physiol. 2023 Jan 6;13:1048008. doi: 10.3389/fphys.2022.1048008 (PMC9852899; doi:10.3389/fphys.2022.1048008)
Supplement: Supplementary file 5 [file Table6.XLSX]

## Sheet: hoja 1
Name	Chromosome	Region	Max group mean	Log₂ fold change	Fold change	P-value	FDR p-value	Bonferroni	GeneID
LOC110524744	NC_035081.1	complement(81762356..81772530)	1.85786	10.4242	1374.06	4.37735e-06	0.00415116	0.203407	110524744
LOC110524746	NC_035081.1	81768165..81770778	1.83223	7.66065	202.342	1.02774e-09	6.30094e-06	4.77571e-05	110524746
LOC110506917	NC_035102.1	complement(35469303..35471615)	1.20275	6.4884	89.7849	1.51615e-06	0.00171744	0.0704524	110506917
LOC110491217	NC_035092.1	1261570..1263016	307.433	5.695	51.8043	2.09832e-13	9.75048e-09	9.75048e-09	110491217
rag1	NC_035078.1	complement(65058438..65062284)	0.225076	5.24941	38.0392	2.59096e-05	0.0158416	1	100136833
LOC110516154	NW_018575087.1	complement(6..745)	0.845738	5.0895	34.0479	0.000111813	0.047234	1	110516154
LOC110519453	NW_018634950.1	complement(727..17509)	1.02504	5.01118	32.249	3.90989e-06	0.00388163	0.181685	110519453
LOC110535232	NC_035087.1	complement(6749488..6754090)	0.207582	5.00337	32.0749	3.2419e-05	0.0179339	1	110535232
LOC110503921	NC_035100.1	complement(17574894..17596067)	0.106073	4.44774	21.8225	0.000117497	0.0491879	1	110503921
LOC110487210	NC_035089.1	2974562..2978556	0.743374	4.22051	18.6423	5.18963e-06	0.00482303	0.241152	110487210
LOC110524716	NC_035081.1	79956826..80005164	0.241703	4.20076	18.3888	3.22872e-08	0.000107166	0.00150032	110524716
LOC110531430	NC_035085.1	complement(4330810..4335038)	1.25439	4.15033	17.7572	1.79456e-06	0.0019393	0.0833897	110531430
slc12a3	NC_035078.1	complement(53745784..53754229)	0.346426	3.82842	14.2059	6.68336e-05	0.0307487	1	110494770
LOC110487671	NC_035090.1	complement(39871641..39875826)	0.868659	3.76551	13.5998	6.98545e-11	1.623e-06	3.246e-06	110487671
fam240a	NC_035082.1	46506740..46508416	6.71721	3.45527	10.9683	8.85832e-05	0.0377641	1	110526127
LOC110487489	NC_035089.1	60705681..60740893	1.67307	2.94622	7.70728	5.32006e-05	0.0257513	1	110487489
LOC110524595	NC_035081.1	72587290..72591640	2.30915	2.75129	6.73319	3.84567e-08	0.000119134	0.00178701	110524595
LOC110512028	NW_018536685.1	complement(217..1441)	2.56319	2.61289	6.1173	7.75621e-05	0.0343209	1	110512028
LOC110523751	NC_035081.1	34327098..34328474	2.16776	2.4875	5.60805	2.51236e-05	0.0155659	1	110523751
LOC110503212	NC_035100.1	33884980..33891885	0.719192	2.2658	4.8092	8.62129e-06	0.00715382	0.400614	110503212
LOC110520656	NC_035079.1	complement(82732716..82755196)	3.11219	2.22685	4.6811	1.99908e-10	2.9025e-06	9.28934e-06	110520656
LOC110506787	NC_035102.1	complement(29803355..29806709)	1.66865	2.2203	4.6599	1.37004e-07	0.000276796	0.0063663	110506787
LOC110485453	NC_035089.1	complement(4352044..4359284)	9.50603	2.17932	4.52941	1.22038e-09	6.30094e-06	5.67085e-05	110485453
pparb	NC_035083.1	62310913..62359684	5.60234	2.12661	4.3669	9.2353e-07	0.00119207	0.0429146	100136658
LOC110539069	NC_035088.1	88914979..88920717	0.994078	2.11866	4.34289	8.85127e-05	0.0377641	1	110539069
LOC110506733	NC_035102.1	25647428..25681977	1.92402	2.06343	4.17979	3.21726e-07	0.000498333	0.01495	110506733
LOC110507736	NC_035077.1	complement(18288581..18319285)	17.1759	2.02244	4.0627	4.11244e-09	1.6385e-05	0.000191097	110507736
acot12	NC_035105.1	10972512..10977522	1.07384	2.01121	4.03121	2.74105e-05	0.0162219	1	110509638
LOC110537682	NC_035088.1	complement(42099819..42146246)	17.8727	2.01051	4.02926	3.2233e-09	1.4978e-05	0.00014978	110537682
LOC110530248	NC_035084.1	54979412..54999538	21.4015	1.94546	3.85162	6.1409e-08	0.000172433	0.00285356	110530248
LOC110534635	NC_035086.1	complement(58873318..58878834)	0.330994	1.91291	3.76568	2.20082e-05	0.0142625	1	110534635
ppargc1a_1	NC_035085.1	complement(16621198..16638946)	1.44749	1.86437	3.64108	7.70049e-08	0.000185004	0.00357827	100462762
LOC110502030	NC_035098.1	23294857..23297108	2.7704	1.85145	3.60863	1.61344e-07	0.000312389	0.00749733	110502030
LOC110534861	NC_035086.1	15759428..15769143	14.6076	1.83926	3.57826	4.23129e-09	1.6385e-05	0.000196619	110534861
LOC110524616	NC_035081.1	complement(73734015..73737115)	3.34806	1.81627	3.5217	1.07157e-05	0.00803124	0.497937	110524616
fnip1	NC_035088.1	complement(47351836..47375462)	10.7933	1.79772	3.47671	7.96263e-08	0.000185004	0.00370008	110537736
LOC110534158	NC_035078.1	complement(2200233..2219869)	8.5232	1.74754	3.35787	7.46688e-07	0.00105143	0.0346971	110534158
LOC110528325	NC_035083.1	58693941..58742579	4.58716	1.71663	3.28667	1.09931e-06	0.00135567	0.0510827	110528325
LOC110508783	NC_035104.1	complement(24447762..24460023)	17.9079	1.69907	3.24691	2.71497e-07	0.000485228	0.0126159	110508783
LOC110502002	NC_035098.1	23280993..23293950	4.89785	1.65101	3.14052	1.37148e-05	0.00961669	0.637299	110502002
LOC110518677	NW_018615861.1	complement(15728..33155)	1.50478	1.63899	3.11447	2.12572e-05	0.0141111	0.987779	110518677
LOC110508620	NC_035104.1	14674555..14703208	6.69943	1.60902	3.05045	8.37413e-06	0.00707508	0.389129	110508620
LOC110497191	NC_035095.1	complement(807318..825602)	2.678	1.60713	3.04645	1.10862e-06	0.00135567	0.0515155	110497191
LOC110493603	NC_035078.1	complement(48352296..48381908)	6.58598	1.60545	3.04291	4.29371e-07	0.000643613	0.019952	110493603
LOC110491289	NC_035092.1	4970341..4992329	3.18681	1.53732	2.90255	7.70844e-05	0.0343209	1	110491289
LOC110523420	NC_035081.1	18722586..18732659	29.2524	1.53676	2.90142	1.04474e-05	0.00795848	0.485467	110523420
LOC110535208	NC_035087.1	complement(5691011..5715995)	1.04512	1.52669	2.88124	2.28197e-05	0.0145259	1	110535208
LOC110508134	NC_035079.1	complement(10276998..10289432)	4.5443	1.4919	2.8126	3.11575e-07	0.000498333	0.0144783	110508134
LOC110535313	NC_035087.1	11908445..11923982	65.6457	1.47484	2.77953	1.25403e-05	0.00910502	0.582722	110535313
LOC110486331	NC_035089.1	36978045..36994897	1.86376	1.47323	2.77643	5.99596e-06	0.00535809	0.27862	110486331
LOC110494097	NC_035093.1	complement(38772552..38796163)	21.6691	1.45356	2.73883	3.01685e-05	0.017096	1	110494097
LOC110497767	NC_035095.1	34652116..34661381	30.08	1.39433	2.62866	3.6434e-05	0.0192388	1	110497767
LOC110534168	NC_035078.1	complement(2220053..2230612)	6.06355	1.34291	2.53662	5.90492e-05	0.027999	1	110534168
LOC110505698	NC_035101.1	complement(63658267..63678706)	2.4241	1.33239	2.51819	5.51085e-06	0.00502114	0.256078	110505698
LOC110498668	NC_035095.1	14670814..14698879	6.77947	1.33174	2.51706	7.19864e-05	0.0324763	1	110498668
zbtb21	NC_035088.1	28716637..28722386	1.70456	1.30969	2.47888	3.58615e-05	0.0191541	1	110537463
LOC110509188	NC_035104.1	1191273..1225815	3.11153	1.28271	2.43295	2.96024e-05	0.017096	1	110509188
LOC110503495	NC_035100.1	complement(270485..282892)	8.9682	1.27583	2.42138	4.8766e-05	0.0245704	1	110503495
LOC110539078	NC_035088.1	57369267..57452288	1.98464	1.24073	2.36319	1.34354e-05	0.00960485	0.624315	110539078
LOC110529710	NC_035084.1	complement(23419536..23438684)	2.18281	1.2113	2.31546	2.2159e-06	0.00228819	0.102969	110529710
LOC110526860	NC_035082.1	81827278..81834759	1.56318	1.14307	2.20851	9.19521e-06	0.00749619	0.427283	110526860
myc_2	NC_035091.1	complement(24268111..24271145)	3.65227	-1.60192	-3.03547	7.82908e-05	0.0343209	1	100136645
LOC110498893	NC_035096.1	complement(6561399..6575238)	1.42977	-1.84352	-3.58884	7.19576e-06	0.00619209	0.334373	110498893
LOC110538592	NC_035088.1	complement(78312165..78315543)	5.30575	-2.26821	-4.81724	2.99904e-05	0.017096	1	110538592
LOC110505572	NC_035079.1	complement(196894..200318)	0.713997	-2.33592	-5.04874	5.20289e-05	0.0254493	1	110505572
LOC110506436	NC_035102.1	13497540..13500522	0.297559	-2.57447	-5.95651	5.54099e-05	0.0265442	1	110506436
LOC110501961	NC_035098.1	46412727..46418286	2.15745	-2.93888	-7.66814	4.7458e-05	0.0245031	1	110501961
mgdp1	NC_035081.1	69155816..69158428	0.588919	-3.03249	-8.18221	1.14241e-07	0.000241297	0.00530854	100305232
LOC110491116	NC_035092.1	complement(52508966..52535663)	0.279502	-3.3032	-9.87105	3.06587e-05	0.0171644	1	110491116
LOC110521250	NC_035080.1	complement(5794802..5806227)	0.532847	-3.31533	-9.95438	6.24989e-05	0.0293354	1	110521250
LOC110525629	NC_035082.1	complement(23617299..23620272)	1.13662	-3.42246	-10.7217	6.37704e-05	0.0296328	1	110525629
LOC110529786	NC_035084.1	28209934..28216868	1.0395	-3.4917	-11.2488	4.91746e-05	0.0245704	1	110529786
LOC110507371	NC_035103.1	complement(4390609..4414083)	0.389247	-3.8735	-14.6568	3.49188e-05	0.0188675	1	110507371
LOC110491625	NC_035092.1	complement(18724148..18726683)	1.04669	-4.10028	-17.1517	1.03371e-05	0.00795848	0.480342	110491625
LOC110509749	NC_035105.1	17737394..17740284	0.450429	-4.49529	-22.5536	2.75788e-05	0.0162219	1	110509749
LOC110523833	NC_035081.1	complement(37747780..37787394)	0.231619	-4.57082	-23.7659	4.4794e-05	0.0233875	1	110523833
LOC110522323	NC_035077.1	33885719..33929497	0.385971	-4.57381	-23.8153	1.47183e-05	0.0100578	0.68393	110522323
LOC110532038	NC_035085.1	32541516..32570856	0.951404	-4.58185	-23.9483	4.91377e-05	0.0245704	1	110532038
LOC110516073	NW_018573971.1	complement(8..35225)	0.508008	-4.64077	-24.9466	2.67682e-05	0.0161541	1	110516073
LOC100170213	NC_035090.1	14465169..14476500	2.21953	-4.64133	-24.9562	6.75636e-06	0.00592367	0.313955	100170213
LOC110523745	NC_035081.1	34125467..34127306	5.32604	-4.81457	-28.1403	1.30707e-06	0.00155292	0.0607368	110523745
LOC100135971	NC_035081.1	32687456..32721371	0.158184	-4.84486	-28.7375	6.99572e-05	0.0318703	1	100135971
LOC110522538	NC_035080.1	complement(76210669..76217339)	1.10331	-5.00177	-32.0393	9.41111e-06	0.00753992	0.437315	110522538
LOC110494570	NC_035093.1	58877137..58887731	0.1871	-5.04628	-33.0431	2.47509e-05	0.0155422	1	110494570
LOC110526026	NC_035082.1	complement(41589570..41596159)	1.51147	-5.06332	-33.4357	2.2099e-05	0.0142625	1	110526026
LOC110537738	NC_035088.1	complement(47481746..47503220)	1.33345	-5.17469	-36.1191	4.0096e-06	0.00388163	0.186318	110537738
LOC110509750	NC_035105.1	complement(17746259..17752053)	4.36535	-5.24937	-38.0381	8.11998e-07	0.00107806	0.0377319	110509750
LOC110505176	NC_035101.1	complement(36262133..36269911)	0.454953	-5.43789	-43.3478	5.10498e-05	0.025236	1	110505176
LOC110486838	NC_035078.1	complement(16023497..16034661)	0.299725	-5.45704	-43.927	7.98106e-05	0.0346602	1	110486838
LOC110499369	NC_035096.1	31193196..31215280	0.842125	-5.56234	-47.2533	2.64027e-07	0.000485228	0.0122688	110499369
LOC110508636	NC_035104.1	15821474..15827710	0.731631	-5.57072	-47.5286	3.33902e-05	0.0182538	1	110508636
LOC110523969	NC_035081.1	43732270..43736090	2.16286	-5.8292	-56.8544	5.06264e-07	0.000735158	0.0235251	110523969
LOC110505165	NC_035101.1	complement(36100556..36121928)	9.71903	-5.9389	-61.3462	6.30835e-08	0.000172433	0.00293136	110505165
LOC110536251	NC_035087.1	62895133..62902117	1.11274	-6.07972	-67.636	1.5523e-06	0.00171744	0.0721324	110536251
LOC110523536	NC_035081.1	complement(24969125..24976343)	2.31618	-6.15942	-71.4776	8.10625e-07	0.00107806	0.0376681	110523536
LOC110509894	NC_035105.1	complement(25849253..25853270)	9.3894	-6.16885	-71.9462	2.21254e-06	0.00228819	0.102812	110509894
LOC110525798	NC_035082.1	complement(29755696..29760404)	2.50138	-6.25731	-76.4958	1.33676e-06	0.00155292	0.0621167	110525798
LOC110522903	NC_035081.1	24949087..24969480	0.935254	-6.26016	-76.6473	3.97676e-06	0.00388163	0.184792	110522903
LOC110497158	NC_035078.1	63505020..63563190	0.408604	-6.30359	-78.9894	3.00454e-07	0.000498333	0.0139615	110497158
LOC110507919	NC_035103.1	28427329..28433785	4.80709	-6.34274	-81.1624	7.18571e-08	0.000185004	0.00333906	110507919
angptl3	NC_035081.1	complement(81694481..81699481)	0.428482	-6.41706	-85.4531	2.00696e-05	0.0135158	0.932593	110524743
LOC110495285	NC_035078.1	55096911..55110073	0.747727	-6.46276	-88.2034	9.61256e-06	0.00757079	0.446676	110495285
LOC110504105	NC_035100.1	complement(25982101..25989284)	3.57889	-6.50197	-90.6332	1.07729e-07	0.000238379	0.00500597	110504105
nefl	NC_035087.1	complement(52542581..52545412)	3.91422	-6.8677	-116.784	5.74466e-09	2.05341e-05	0.000266943	110535992
LOC110536388	NC_035087.1	complement(71628995..71632549)	17.5685	-6.94537	-123.243	8.58173e-10	6.30094e-06	3.98776e-05	110536388
LOC110519050	NC_035079.1	complement(37177090..37183870)	18.7418	-7.09807	-137.003	1.2055e-09	6.30094e-06	5.60174e-05	110519050
LOC110536953	NC_035088.1	complement(8035678..8038747)	16.5025	-7.31685	-159.438	4.22431e-10	3.9259e-06	1.96295e-05	110536953
LOC110536145	NC_035087.1	complement(57888984..57894284)	1.0249	-7.4989	-180.882	2.88104e-07	0.000495838	0.0133876	110536145
LOC110529701	NC_035084.1	23106648..23110916	0.676888	-7.61191	-195.621	1.38658e-05	0.00961669	0.644318	110529701
LOC110525767	NC_035082.1	complement(28699913..28704285)	0.482088	-7.6871	-206.085	1.12535e-05	0.00830043	0.522927	110525767
LOC110489980	NC_035078.1	complement(27211617..27218549)	6.26039	-8.69047	-413.136	2.49849e-10	2.9025e-06	1.161e-05	110489980
