# Supplementary material for: Role of glucocorticoid and mineralocorticoid receptors in rainbow trout (Oncorhynchus mykiss) skeletal muscle: A transcriptomic perspective of cortisol action
Source: Front Physiol. 2023 Jan 6;13:1048008. doi: 10.3389/fphys.2022.1048008 (PMC9852899; doi:10.3389/fphys.2022.1048008)
Supplement: Supplementary file 6 [file Table11.XLSX]

## Sheet: Hoja 1
Category	Term	Count	PValue	Fold Enrichment		Category	Term	Count	PValue	Fold Enrichment		Category	Term	Count	PValue	Fold Enrichment		Category	Term	Count	PValue	Fold Enrichment
GOTERM_BP_DIRECT	GO:0006936~muscle contraction	8	4.45995e-10	43.7636		GOTERM_CC_DIRECT	GO:0030017~sarcomere	5	1.71276e-06	55.6288		GOTERM_MF_DIRECT	GO:0003779~actin binding	8	2.98439e-06	12.1446		KEGG_PATHWAY	hsa05410:Hypertrophic cardiomyopathy	4	0.000940484	19.0784
GOTERM_BP_DIRECT	GO:0045214~sarcomere organization	5	1.12266e-06	61.7179		GOTERM_CC_DIRECT	GO:0032982~myosin filament	4	5.79966e-06	108.476		GOTERM_MF_DIRECT	GO:0000146~microfilament motor activity	3	0.000962526	63.3037		KEGG_PATHWAY	hsa05414:Dilated cardiomyopathy	4	0.00113438	17.886
GOTERM_BP_DIRECT	GO:0060048~cardiac muscle contraction	5	1.83946e-06	54.7045		GOTERM_CC_DIRECT	GO:0005861~troponin complex	3	0.000137094	162.714		GOTERM_MF_DIRECT	GO:0008307~structural constituent of muscle	3	0.0042242	30.1446		KEGG_PATHWAY	hsa04260:Cardiac muscle contraction	3	0.0154041	14.8022
GOTERM_BP_DIRECT	GO:0055010~ventricular cardiac muscle tissue morphogenesis	4	1.71296e-05	77.024		GOTERM_CC_DIRECT	GO:0005859~muscle myosin complex	3	0.000580882	81.3571		GOTERM_MF_DIRECT	GO:0031014~troponin T binding	2	0.00921	211.012		KEGG_PATHWAY	hsa04550:Signaling pathways regulating pluripotency of stem cells	3	0.0388764	9.00552
GOTERM_BP_DIRECT	GO:0003009~skeletal muscle contraction	4	2.70615e-05	66.4		GOTERM_CC_DIRECT	GO:0030018~Z disc	4	0.00235789	14.7086		GOTERM_MF_DIRECT	GO:0003774~motor activity	3	0.0101633	19.183		KEGG_PATHWAY	hsa04261:Adrenergic signaling in cardiomyocytes	3	0.0424038	8.58526
GOTERM_BP_DIRECT	GO:0014883~transition between fast and slow fiber	3	0.000142608	160.467		GOTERM_CC_DIRECT	GO:0016459~myosin complex	3	0.00564999	26.0343		GOTERM_MF_DIRECT	GO:0051373~FATZ binding	2	0.0114996	168.81
GOTERM_BP_DIRECT	GO:0030049~muscle filament sliding	3	0.000217317	131.291		GOTERM_CC_DIRECT	GO:0031672~A band	2	0.0310514	61.9864		GOTERM_MF_DIRECT	GO:0031432~titin binding	2	0.0318749	60.2893
GOTERM_BP_DIRECT	GO:0046697~decidualization	3	0.00135878	53.4889		GOTERM_CC_DIRECT	GO:0005737~cytoplasm	18	0.0536018	1.49565		GOTERM_MF_DIRECT	GO:0005516~calmodulin binding	3	0.0705486	6.69881
GOTERM_BP_DIRECT	GO:0032922~circadian regulation of gene expression	3	0.00909517	20.3408		GOTERM_CC_DIRECT	GO:0030016~myofibril	2	0.0611613	30.9932		GOTERM_MF_DIRECT	GO:0005515~protein binding	26	0.0879926	1.24902
GOTERM_BP_DIRECT	GO:0002074~extraocular skeletal muscle development	2	0.0100868	192.56
GOTERM_BP_DIRECT	GO:0015820~leucine transport	2	0.0100868	192.56
GOTERM_BP_DIRECT	GO:0060136~embryonic process involved in female pregnancy	2	0.0140937	137.543
GOTERM_BP_DIRECT	GO:0045893~positive regulation of transcription, DNA-templated	6	0.0141808	4.03408
GOTERM_BP_DIRECT	GO:0006942~regulation of striated muscle contraction	2	0.0180848	106.978
GOTERM_BP_DIRECT	GO:0051726~regulation of cell cycle	4	0.0258895	6.09367
GOTERM_BP_DIRECT	GO:0035988~chondrocyte proliferation	2	0.0279938	68.7714
GOTERM_BP_DIRECT	GO:0006937~regulation of muscle contraction	2	0.0299639	64.1867
GOTERM_BP_DIRECT	GO:0006941~striated muscle contraction	2	0.0299639	64.1867
GOTERM_BP_DIRECT	GO:0001829~trophectodermal cell differentiation	2	0.0319301	60.175
GOTERM_BP_DIRECT	GO:0045664~regulation of neuron differentiation	2	0.0590524	32.0933
GOTERM_BP_DIRECT	GO:0046034~ATP metabolic process	2	0.0685583	27.5086
