# Supplementary material for: Role of glucocorticoid and mineralocorticoid receptors in rainbow trout (Oncorhynchus mykiss) skeletal muscle: A transcriptomic perspective of cortisol action
Source: Front Physiol. 2023 Jan 6;13:1048008. doi: 10.3389/fphys.2022.1048008 (PMC9852899; doi:10.3389/fphys.2022.1048008)
Supplement: Supplementary file 7 [file Table4.XLSX]

## Sheet: hoja 1
Name	Chromosome	Region	Max group mean	Log₂ fold change	Fold change	P-value	FDR p-value	Bonferroni	GeneID
LOC110493276	NC_035093.1	complement(66514304..66550694)	12.1765	10.3532	1308.02	1.29341e-13	3.00511e-09	6.01022e-09	110493276
LOC110537255	NC_035088.1	complement(21634999..21635834)	1.7644	6.58059	95.7095	1.55139e-05	0.0101535	0.7209	110537255
LOC110494233	NC_035093.1	complement(43083708..43101548)	0.307385	5.82222	56.5801	7.64916e-05	0.031455	1	110494233
LOC110509883	NC_035079.1	16668437..16687094	0.125812	5.75254	53.9123	3.77362e-05	0.0197025	1	110509883
LOC110487671	NC_035090.1	complement(39871641..39875826)	2.98123	5.40288	42.3085	0	0	0	110487671
LOC110532433	NC_035085.1	49407171..49457006	2.51525	4.95809	31.0838	1.4049e-09	5.93481e-06	6.52829e-05	110532433
LOC110491217	NC_035092.1	1261570..1263016	140.029	4.63152	24.7871	2.35614e-09	8.42768e-06	0.000109485	110491217
LOC110517641	NW_018598154.1	204..2812	1.35082	4.30076	19.7087	8.78606e-05	0.0345992	1	110517641
LOC110519453	NW_018634950.1	complement(727..17509)	0.581523	4.15572	17.8236	0.000134193	0.0476007	1	110519453
LOC110498119	NC_035095.1	complement(49727990..49734372)	0.154692	3.78339	13.7694	0.000102023	0.0376253	1	110498119
LOC110486254	NC_035089.1	complement(33962897..33963960)	79.3486	3.67771	12.7968	6.16974e-06	0.00573391	0.286695	110486254
hsp70b	NC_035089.1	complement(33931831..33935009)	112.538	3.35589	10.2382	3.04041e-06	0.00344589	0.141282	100137015
LOC110491818	NC_035092.1	complement(28867487..28883910)	0.897739	3.23941	9.44408	2.76562e-05	0.0156723	1	110491818
LOC110499515	NC_035096.1	complement(40002927..40024351)	32.6303	3.18727	9.10886	5.66501e-07	0.000849166	0.0263241	110499515
LOC110485160	NC_035089.1	complement(33964034..33967466)	64.3461	3.15509	8.90793	8.97667e-06	0.00719186	0.417128	110485160
LOC110493887	NC_035093.1	25168975..25180700	3.42118	3.13516	8.78572	9.28644e-06	0.00731393	0.431522	110493887
LOC110500075	NC_035078.1	complement(78231678..78239142)	29.3507	3.06905	8.39219	8.35057e-06	0.00680762	0.388034	110500075
mb	NC_035093.1	complement(7175711..7178908)	73.0885	3.01197	8.06663	1.749e-05	0.0111332	0.812727	100329203
LOC110489277	NC_035090.1	complement(31446971..31472814)	0.68995	2.97769	7.87722	4.21293e-06	0.00442824	0.195766	110489277
LOC110499607	NC_035096.1	complement(40031447..40035209)	0.637668	2.9667	7.81749	5.28892e-05	0.0249839	1	110499607
LOC110535214	NC_035087.1	complement(6405662..6432645)	110.249	2.96357	7.8005	6.92452e-06	0.00619209	0.321768	110535214
LOC110502057	NC_035098.1	16175725..16221607	0.388272	2.84854	7.20272	1.13086e-05	0.00847559	0.525486	110502057
LOC110513633	NC_035079.1	25062376..25088784	84.4774	2.77652	6.85197	2.0186e-06	0.00268001	0.0938004	110513633
LOC110511275	NW_018530369.1	4161..7616	2031.48	2.7732	6.83623	2.32478e-05	0.0140296	1	110511275
LOC110489781	NC_035091.1	complement(17557778..17561191)	5.75752	2.68021	6.40949	3.13059e-05	0.0174016	1	110489781
LOC110526520	NC_035082.1	67193636..67230618	21.8849	2.66778	6.35449	5.32281e-05	0.0249839	1	110526520
LOC110524558	NC_035077.1	47624244..47630487	485.294	2.64462	6.25331	3.52627e-05	0.0188344	1	110524558
LOC110491567	NC_035092.1	complement(17497107..17500615)	31.9504	2.60285	6.07486	7.71535e-06	0.00659497	0.358517	110491567
LOC110506650	NC_035102.1	22235408..22283527	19.3156	2.59645	6.04796	1.09389e-05	0.00833295	0.50831	110506650
LOC110500060	NC_035078.1	complement(78212887..78223853)	66.0375	2.54856	5.85048	0.000100413	0.0375469	1	110500060
LOC110520656	NC_035079.1	complement(82732716..82755196)	4.17049	2.53196	5.78356	4.3554e-13	6.74623e-09	2.02387e-08	110520656
LOC110486073	NC_035089.1	complement(26682380..26707147)	9.00066	2.40029	5.27908	1.37857e-05	0.00970598	0.640595	110486073
LOC100135901	NC_035087.1	complement(6443816..6458517)	160.043	2.37586	5.19046	9.81188e-05	0.037372	1	100135901
LOC110506787	NC_035102.1	complement(29803355..29806709)	1.96545	2.3671	5.15904	1.86401e-08	4.55879e-05	0.000866169	110506787
LOC110517049	NC_035079.1	31545335..31627284	10.8319	2.34614	5.08461	4.63248e-05	0.022192	1	110517049
LOC110489301	NC_035090.1	complement(29778874..29840076)	1.07206	2.32666	5.01643	3.20773e-05	0.0175361	1	110489301
LOC110532943	NC_035085.1	complement(10896638..10927356)	6.76429	2.26506	4.80674	4.37606e-07	0.000726238	0.0203347	110532943
LOC110512516	NC_035079.1	complement(23149686..23156228)	3.54362	2.25394	4.76985	1.88967e-05	0.0118661	0.878094	110512516
LOC110535216	NC_035087.1	6461890..6492706	0.178069	2.16176	4.47461	3.14567e-05	0.0174016	1	110535216
hsp70a	NC_035088.1	complement(66825718..66829287)	5.28457	1.95368	3.87361	5.94554e-06	0.00563832	0.276278	100135836
LOC110528748	NC_035083.1	5302029..5305519	12.9641	1.95124	3.86707	1.13119e-06	0.00159285	0.0525642	110528748
LOC110504971	NC_035101.1	25787979..25790753	242.89	1.93411	3.82141	1.99052e-05	0.0121811	0.924957	110504971
LOC110497480	NC_035095.1	16928129..16937402	6.69999	1.86887	3.65247	4.18502e-06	0.00442824	0.19447	110497480
LOC110528289	NC_035083.1	57113587..57149120	0.981059	1.86181	3.63464	7.61469e-05	0.031455	1	110528289
LOC110526168	NC_035082.1	complement(51129552..51260111)	0.343401	1.83023	3.55593	2.66683e-05	0.015299	1	110526168
LOC110534158	NC_035078.1	complement(2200233..2219869)	9.38523	1.82859	3.55189	2.20838e-07	0.000427579	0.0102619	110534158
LOC110488772	NC_035090.1	53094265..53096801	105.376	1.7933	3.46606	3.95381e-05	0.0201896	1	110488772
thap1	NC_035081.1	complement(3076382..3079104)	3.00236	1.74759	3.35798	1.19782e-05	0.00883493	0.556601	110523114
LOC110523420	NC_035081.1	18722586..18732659	32.3652	1.60323	3.03822	4.24552e-06	0.00442824	0.197281	110523420
LOC110489122	NC_035090.1	71696794..71706287	1.38713	1.53472	2.89732	1.16551e-06	0.00159291	0.0541591	110489122
LOC110502030	NC_035098.1	23294857..23297108	2.29282	1.5341	2.89608	1.43253e-05	0.00984534	0.665667	110502030
LOC110485919	NC_035089.1	complement(18522490..18526249)	1.54596	1.53256	2.89298	0.000110942	0.0402755	1	110485919
LOC110534168	NC_035078.1	complement(2220053..2230612)	7.07701	1.48852	2.80601	8.19267e-06	0.00679816	0.380697	110534168
LOC110509977	NC_035105.1	complement(28435313..28447657)	30.3637	1.48483	2.79883	3.49458e-05	0.0188344	1	110509977
LOC110525725	NC_035082.1	complement(27566459..27633049)	1.61955	1.47855	2.78669	6.30639e-05	0.0287299	1	110525725
LOC110499986	NC_035097.1	12922925..12946783	2.17503	1.36686	2.57908	2.26756e-06	0.00277287	0.105369	110499986
LOC110533350	NC_035086.1	7634423..7639207	17.5366	1.36592	2.57741	7.43341e-05	0.0311185	1	110533350
LOC110507736	NC_035077.1	complement(18288581..18319285)	11.5124	1.35508	2.55812	8.19025e-05	0.0333846	1	110507736
ppargc1a_1	NC_035085.1	complement(16621198..16638946)	1.07096	1.32974	2.51357	0.000129818	0.0464029	1	100462762
LOC110508999	NC_035104.1	31814987..31820072	9.62198	1.31902	2.49497	7.33822e-05	0.0309993	1	110508999
LOC110534861	NC_035086.1	15759428..15769143	10.1434	1.2259	2.33902	9.10148e-05	0.0355085	1	110534861
LOC110486009	NC_035078.1	14104170..14119987	2.08519	1.184	2.27205	4.15758e-05	0.0205909	1	110486009
LOC110508134	NC_035079.1	complement(10276998..10289432)	3.84711	1.17425	2.25675	5.72146e-05	0.0263233	1	110508134
LOC110538564	NC_035088.1	77563931..77566704	5.43205	1.11206	2.16154	7.04217e-05	0.0305828	1	110538564
LOC110501995	NC_035098.1	48369812..48388679	4.65266	-1.35455	-2.55717	0.000144179	0.0499978	1	110501995
LOC110529943	NC_035077.1	73465108..73473239	0.591033	-2.00907	-4.02522	0.000101002	0.0375469	1	110529943
LOC110498893	NC_035096.1	complement(6561399..6575238)	1.42977	-2.41654	-5.33889	4.56143e-09	1.32475e-05	0.000211961	110498893
LOC110506480	NC_035102.1	15802902..15818882	4.67732	-2.6646	-6.34053	1.51716e-05	0.0101535	0.704993	110506480
LOC110486725	NC_035089.1	47247112..47248881	363.133	-2.92338	-7.58622	4.38364e-06	0.00442824	0.203699	110486725
leap-2a	NC_035085.1	3513568..3542911	7.13139	-2.97377	-7.85586	3.93672e-05	0.0201896	1	100136188
lcn2	NC_035081.1	42581896..42586881	0.596878	-3.13657	-8.7943	6.59803e-05	0.0294805	1	110523947
LOC110496559	NC_035094.1	complement(48958159..48977466)	0.718888	-3.16349	-8.95992	7.26001e-05	0.0309503	1	110496559
LOC110537939	NC_035078.1	7694923..7699604	12.134	-3.40863	-10.6194	2.90391e-07	0.000518995	0.0134939	110537939
LOC110511142	NC_035079.1	18890835..18895177	0.26871	-3.45339	-10.954	7.80587e-06	0.00659497	0.362723	110511142
LOC110520576	NC_035079.1	complement(76288614..76291212)	0.232554	-3.47115	-11.0897	0.000143882	0.0499978	1	110520576
LOC110525629	NC_035082.1	complement(23617299..23620272)	1.13662	-3.49548	-11.2783	4.22734e-05	0.0206775	1	110525629
LOC110526833	NC_035082.1	80816808..80820645	16.7946	-3.5289	-11.5426	0.000123005	0.0443085	1	110526833
LOC110521250	NC_035080.1	complement(5794802..5806227)	0.532847	-3.61443	-12.2476	1.36077e-05	0.00970598	0.632325	110521250
LOC100136150	NC_035104.1	18093235..18107295	8.68552	-3.74268	-13.3863	8.61533e-05	0.0342411	1	100136150
fhl2	NC_035079.1	complement(75466761..75480198)	5.92094	-3.87866	-14.7093	9.97564e-05	0.0375469	1	110520543
LOC110515516	NW_018568069.1	880..2276	56.5528	-3.89297	-14.856	2.36202e-06	0.00281432	0.109758	110515516
LOC110529571	NC_035084.1	complement(17429681..17431427)	6.99424	-3.90204	-14.9496	4.16532e-05	0.0205909	1	110529571
LOC110527738	NC_035083.1	complement(31447991..31527032)	0.167747	-4.01231	-16.1371	8.62143e-05	0.0342411	1	110527738
LOC110486715	NC_035089.1	47081821..47084518	1.15884	-4.01848	-16.2062	0.000140177	0.0493465	1	110486715
LOC110527026	NC_035082.1	80832015..80833145	5.61567	-4.04269	-16.4806	5.48378e-05	0.025482	1	110527026
LOC110494115	NC_035093.1	complement(39326393..39341627)	10.45	-4.06357	-16.7208	1.99227e-05	0.0121811	0.925767	110494115
LOC110529786	NC_035084.1	28209934..28216868	1.0395	-4.06522	-16.74	2.65401e-06	0.00308316	0.123327	110529786
LOC110509750	NC_035105.1	complement(17746259..17752053)	4.36535	-4.3423	-20.2844	4.03519e-05	0.0203812	1	110509750
LOC110516073	NW_018573971.1	complement(8..35225)	0.508008	-4.41351	-21.3107	4.59017e-05	0.022192	1	110516073
LOC110511110	NW_018528687.1	complement(4264..5874)	0.424939	-4.48394	-22.377	9.72299e-05	0.0373395	1	110511110
antiprot1	NC_035080.1	73999273..74001855	0.452425	-4.51381	-22.845	1.62697e-05	0.0105003	0.756018	100136095
LOC110537931	NC_035078.1	7701547..7702949	0.521054	-4.59468	-24.1622	9.1698e-05	0.0355085	1	110537931
LOC100135971	NC_035081.1	32687456..32721371	0.158184	-4.63118	-24.7813	7.18149e-05	0.030899	1	100135971
LOC110492964	NC_035078.1	45545648..45561074	25.7354	-4.63548	-24.8553	1.44074e-05	0.00984534	0.669483	110492964
LOC110522323	NC_035077.1	33885719..33929497	0.385971	-4.80427	-27.9401	5.40127e-06	0.00534013	0.250986	110522323
LOC110523536	NC_035081.1	complement(24969125..24976343)	2.31618	-4.88241	-29.4953	6.83517e-05	0.0302492	1	110523536
LOC100170213	NC_035090.1	14465169..14476500	2.21953	-4.88956	-29.6418	2.14466e-06	0.00269346	0.099658	100170213
LOC100136168	NC_035089.1	complement(45979954..45986983)	2.27721	-5.09909	-34.2751	1.03907e-05	0.00804724	0.482834	100136168
LOC110520546	NC_035079.1	75568027..75572692	0.47275	-5.15359	-35.5948	7.04189e-05	0.0305828	1	110520546
LOC110497158	NC_035078.1	63505020..63563190	0.408604	-5.15732	-35.6868	7.06251e-06	0.00619209	0.328181	110497158
LOC110503531	NC_035100.1	complement(2268161..2269969)	4.50165	-5.26605	-38.4803	3.99827e-08	8.84722e-05	0.00185792	110503531
LOC110523833	NC_035081.1	complement(37747780..37787394)	0.231619	-5.29968	-39.3878	7.04795e-06	0.00619209	0.327504	110523833
chga	NC_035084.1	complement(25681101..25695549)	0.452226	-5.30987	-39.6669	6.37369e-05	0.0287546	1	110529746
LOC110524827	NC_035081.1	complement(86428778..86457822)	0.92394	-5.4096	-42.5063	2.16877e-07	0.000427579	0.0100778	110524827
LOC110515990	NW_018573488.1	5376..12736	2.23459	-5.42508	-42.9648	2.64844e-05	0.015299	1	110515990
LOC110505165	NC_035101.1	complement(36100556..36121928)	9.71903	-5.54855	-46.8035	3.81191e-07	0.000656043	0.0177132	110505165
LOC110522903	NC_035081.1	24949087..24969480	0.935254	-5.59548	-48.3512	1.24844e-05	0.00906447	0.580126	110522903
angptl3	NC_035081.1	complement(81694481..81699481)	0.428482	-5.73794	-53.3692	2.58235e-05	0.0151895	1	110524743
LOC110538640	NC_035088.1	complement(79414361..79420306)	2.65066	-5.73947	-53.4261	4.31227e-06	0.00442824	0.200383	110538640
nefl	NC_035087.1	complement(52542581..52545412)	3.91422	-5.75035	-53.8304	4.73253e-07	0.000758315	0.0219911	110535992
LOC110499369	NC_035096.1	31193196..31215280	0.842125	-6.05891	-66.6673	3.31209e-08	7.6953e-05	0.00153906	110499369
LOC110529701	NC_035084.1	23106648..23110916	0.676888	-6.06354	-66.8818	2.44408e-05	0.0145605	1	110529701
LOC110526026	NC_035082.1	complement(41589570..41596159)	1.51147	-6.07374	-67.3563	7.21918e-07	0.00104831	0.0335461	110526026
LOC110495180	NC_035093.1	complement(45127943..45132778)	0.382799	-6.11145	-69.1403	8.49159e-05	0.0342411	1	110495180
coch	NC_035095.1	complement(30069710..30076714)	1.16277	-6.15288	-71.1544	1.81066e-10	1.12222e-06	8.41379e-06	110497696
LOC110523745	NC_035081.1	34125467..34127306	5.32604	-6.30925	-79.3	7.01793e-10	3.26109e-06	3.26109e-05	110523745
LOC110536388	NC_035087.1	complement(71628995..71632549)	17.5685	-6.68916	-103.19	2.84826e-09	9.45378e-06	0.000132353	110536388
LOC110509894	NC_035105.1	complement(25849253..25853270)	9.3894	-6.78096	-109.97	2.77991e-07	0.000516707	0.0129177	110509894
LOC110536145	NC_035087.1	complement(57888984..57894284)	1.0249	-6.88049	-117.824	5.22987e-07	0.000810072	0.0243022	110536145
LOC110513982	NC_035079.1	complement(25652520..25678017)	0.368081	-6.88139	-117.898	3.72327e-05	0.0196606	1	110513982
LOC110539178	NC_035088.1	complement(78692677..78705862)	4.4509	-6.94969	-123.613	2.10691e-06	0.00269346	0.0979039	110539178
LOC110525767	NC_035082.1	complement(28699913..28704285)	0.482088	-7.05521	-132.993	5.61145e-06	0.00543235	0.260753	110525767
LOC110523969	NC_035081.1	43732270..43736090	2.16286	-7.20519	-147.563	2.35775e-09	8.42768e-06	0.00010956	110523969
LOC110486838	NC_035078.1	complement(16023497..16034661)	0.299725	-7.2437	-151.555	1.53184e-05	0.0101535	0.711815	110486838
LOC110519050	NC_035079.1	complement(37177090..37183870)	18.7418	-7.44309	-174.018	1.93204e-10	1.12222e-06	8.97779e-06	110519050
LOC110504105	NC_035100.1	complement(25982101..25989284)	3.57889	-7.5658	-189.467	6.74283e-09	1.84309e-05	0.000313326	110504105
LOC110507919	NC_035103.1	28427329..28433785	4.80709	-7.60484	-194.664	4.15145e-10	2.14344e-06	1.92909e-05	110507919
LOC110525798	NC_035082.1	complement(29755696..29760404)	2.50138	-7.7273	-211.909	5.56012e-08	0.00011744	0.00258368	110525798
LOC110522538	NC_035080.1	complement(76210669..76217339)	1.10331	-7.77166	-218.525	3.38964e-09	1.05006e-05	0.00015751	110522538
LOC110537738	NC_035088.1	complement(47481746..47503220)	1.33345	-8.05613	-266.156	8.91266e-09	2.30085e-05	0.000414153	110537738
LOC110536953	NC_035088.1	complement(8035678..8038747)	16.5025	-8.22851	-299.937	4.20275e-12	3.90587e-08	1.95293e-07	110536953
LOC110489980	NC_035078.1	complement(27211617..27218549)	6.26039	-8.89855	-477.235	9.05949e-11	7.01627e-07	4.20976e-06	110489980
LOC110495285	NC_035078.1	55096911..55110073	0.747727	-8.98371	-506.25	0.000108181	0.0395822	1	110495285
LOC110486651	NC_035089.1	complement(45283913..45300570)	23.522	-10.1591	-1143.35	8.32667e-13	9.6731e-09	3.86924e-08	110486651
