# Supplementary material for: Role of glucocorticoid and mineralocorticoid receptors in rainbow trout (Oncorhynchus mykiss) skeletal muscle: A transcriptomic perspective of cortisol action
Source: Front Physiol. 2023 Jan 6;13:1048008. doi: 10.3389/fphys.2022.1048008 (PMC9852899; doi:10.3389/fphys.2022.1048008)
Supplement: Supplementary file 9 [file Table1.XLSX]

## Sheet: Hoja1
Gene name	Gene ID	Sequence (5´to 3´)
40S ribosomal protein S30	fau	F: CATTTAGGAGTTGGCGTTGG
		R: CCAAGGTTGAAAAGCAGGAG
beta actin	actb	F: GCCGGCCGCGACCTCACAGACTAC
		R: CGGCCGTGGTGGTGAAGCTGTAGC
Toll-like receptor 5 soluble form	tlr5s	F:CATCGCCCTGCAGATTTTAT
		R: CAGAGAGACGAGGCCTTTGA
Interleukin-1 beta	il1b	F: AGGGAGGCAGCAACAA
		R: AATCGCACCATCTCACTTTC
Chemokine (C-C motif) ligand 13	ccl13	F:CCCAATGGGAATTTTAT
		R:GCGCGTTAATAGGCAA
Myosin heavy chain 4	myh4	F: AGAGGGATCCAAGCAAGGGT
		R: GTTTCCCACTGGTCCCGAAG
Myosin heavy chain 7	myh7	F: ATGCTATCATGCCTGGCTCG
		R: CAGCTGGTCTCAGCCAATGA
