# Supplementary material for: Role of glucocorticoid and mineralocorticoid receptors in rainbow trout (Oncorhynchus mykiss) skeletal muscle: A transcriptomic perspective of cortisol action
Source: Front Physiol. 2023 Jan 6;13:1048008. doi: 10.3389/fphys.2022.1048008 (PMC9852899; doi:10.3389/fphys.2022.1048008)
Supplement: Supplementary file 11 [file Table10.XLSX]

## Sheet: Hoja 1
Name	Chromosome	Region	Max group mean	Log₂ fold change	Fold change	P-value	FDR p-value	Bonferroni	GeneID
LOC110515840	NW_018571453.1	433..1651	88.5641	8.84925	461.199	1.92555e-05	0.0265397	0.894763	110515840
LOC100135946	NC_035081.1	18915556..18918015	2.08993	7.35877	164.138	4.51064e-10	1.048e-05	2.09601e-05	100135946
LOC110489980	NC_035078.1	complement(27211617..27218549)	0.633782	5.55858	47.1303	5.33723e-05	0.039946	1	110489980
LOC110519050	NC_035079.1	complement(37177090..37183870)	4.57125	5.23176	37.5765	7.46929e-06	0.0188944	0.347083	110519050
LOC110536953	NC_035088.1	complement(8035678..8038747)	3.11463	5.0813	33.8552	1.4569e-05	0.0225664	0.676993	110536953
LOC110516339	NW_018577154.1	complement(8170..9327)	0.328646	5.03372	32.7568	2.65623e-05	0.0287046	1	110516339
LOC110536388	NC_035087.1	complement(71628995..71632549)	4.09622	5.01273	32.2836	9.64549e-06	0.0194129	0.448206	110536388
il-1rii	NC_035079.1	complement(65164889..65170371)	0.71056	3.20594	9.2275	3.32016e-05	0.0328258	1	100136032
LOC110510482	NW_018522981.1	22937..23473	0.768755	2.83067	7.11402	7.30911e-05	0.049947	1	110510482
mgdp1	NC_035081.1	69155816..69158428	0.349336	2.3757	5.18987	3.95973e-05	0.0347171	1	100305232
LOC110486689	NC_035078.1	complement(15571863..15573264)	29.445	2.01421	4.03958	3.08353e-05	0.0313121	1	110486689
LOC110512049	NW_018536819.1	7..943	379.187	2.00618	4.01717	2.04451e-05	0.0265397	0.950041	110512049
slc3a2	NC_035105.1	28030869..28035936	16.6601	1.97843	3.94064	2.02251e-05	0.0265397	0.939822	110509955
cited2	NC_035084.1	complement(19575541..19577936)	5.06566	1.87723	3.67369	3.54727e-05	0.0333039	1	110529621
LOC110493449	NC_035093.1	7044012..7059085	10.3326	1.85811	3.62532	4.8266e-07	0.00448565	0.0224282	110493449
LOC110486765	NC_035089.1	48447675..48449120	17.3685	1.82203	3.53577	2.6414e-05	0.0287046	1	110486765
LOC100136256	NC_035089.1	11276451..11278234	10.5568	1.65966	3.15942	8.83924e-06	0.0191731	0.410742	100136256
LOC110488126	NC_035090.1	complement(18771283..18774595)	5.12306	1.64307	3.12329	5.0215e-05	0.039549	1	110488126
LOC110524135	NC_035081.1	complement(54472948..54481457)	102.378	1.62202	3.07806	1.24388e-05	0.0219417	0.578005	110524135
LOC110525971	NC_035082.1	complement(37923728..37925472)	92.5637	1.53303	2.89394	2.37611e-05	0.0276033	1	110525971
rgs1	NC_035104.1	complement(32477863..32480215)	11.6586	1.51924	2.86641	4.19953e-05	0.0361377	1	100305249
LOC110525406	NC_035082.1	16220627..16229508	14.1417	1.35034	2.54972	5.29889e-05	0.039946	1	110525406
LOC110516346	NW_018577360.1	81..1247	8.22055	1.29881	2.46026	2.1032e-05	0.0265397	0.977316	110516346
LOC110487370	NC_035078.1	complement(17704372..17723111)	1.32972	-1.09254	-2.1325	6.04399e-05	0.043208	1	110487370
LOC110538573	NC_035078.1	9271320..9284900	6.95249	-1.60709	-3.04636	5.50173e-05	0.039946	1	110538573
LOC110527954	NC_035083.1	complement(40656025..40658257)	57.5871	-1.65674	-3.15304	3.58353e-05	0.0333039	1	110527954
LOC110500817	NC_035097.1	complement(51665771..51687752)	2.12422	-1.86098	-3.63255	4.64073e-05	0.0371803	1	110500817
LOC110535950	NC_035078.1	2900737..2927323	0.486615	-1.93523	-3.8244	2.61636e-05	0.0287046	1	110535950
LOC110522210	NC_035080.1	complement(59997986..60005359)	4.92183	-2.00665	-4.01848	2.17033e-05	0.0265397	1	110522210
LOC110529586	NC_035084.1	complement(18196430..18207479)	11.1041	-2.13702	-4.39853	6.55668e-06	0.0188944	0.304676	110529586
LOC110512516	NC_035079.1	complement(23149686..23156228)	1.66008	-2.15386	-4.45017	5.17606e-05	0.039946	1	110512516
LOC110532296	NC_035085.1	complement(42567269..42583856)	2.36004	-2.19314	-4.57299	2.27286e-05	0.0270808	1	110532296
LOC110514787	NW_018560894.1	9845..13392	1.21366	-2.19553	-4.58058	8.26863e-07	0.00548895	0.0384227	110514787
LOC110502521	NC_035099.1	17325627..17341747	2.00255	-2.1962	-4.58271	4.30576e-05	0.0363782	1	110502521
LOC110497486	NC_035095.1	17373569..17385165	2.74931	-2.28816	-4.88432	4.70386e-06	0.0188944	0.218579	110497486
LOC110505046	NC_035101.1	28259938..28261370	5.53664	-2.29639	-4.91226	3.44796e-05	0.0333039	1	110505046
LOC110492266	NC_035092.1	49437510..49441345	164.886	-2.31937	-4.99115	1.74573e-05	0.0261679	0.811206	110492266
LOC110501380	NC_035098.1	10581794..10687768	0.516031	-2.3276	-5.0197	6.96111e-05	0.0483494	1	110501380
LOC110506650	NC_035102.1	22235408..22283527	9.1652	-2.40785	-5.30683	4.61816e-05	0.0371803	1	110506650
LOC110500218	NC_035097.1	22250387..22257093	49.567	-2.44945	-5.46207	1.04442e-05	0.0194129	0.485322	110500218
LOC110499490	NC_035096.1	38009348..38010457	23.7785	-2.45239	-5.47322	7.19008e-06	0.0188944	0.334109	110499490
LOC100135901	NC_035087.1	complement(6443816..6458517)	99.9915	-2.46209	-5.51014	5.42886e-05	0.039946	1	100135901
LOC110494555	NC_035093.1	complement(58503034..58525068)	0.203743	-2.519	-5.73185	5.6209e-06	0.0188944	0.261192	110494555
LOC110517049	NC_035079.1	31545335..31627284	6.17657	-2.58013	-5.97992	7.72563e-06	0.0188944	0.358994	110517049
LOC110492049	NC_035092.1	complement(39183885..39185240)	21.0337	-2.58937	-6.01835	2.11728e-05	0.0265397	0.98386	110492049
LOC110486073	NC_035089.1	complement(26682380..26707147)	5.1793	-2.5897	-6.01973	3.10844e-06	0.0159839	0.144443	110486073
LOC110510910	NW_018527067.1	complement(4781..21220)	8.05217	-2.61023	-6.106	3.43977e-06	0.0159839	0.159839	110510910
LOC100136149	NC_035091.1	17565051..17581078	40.5165	-2.72836	-6.62703	9.0774e-06	0.0191731	0.421809	100136149
LOC110522722	NC_035080.1	complement(5565728..5633466)	0.247042	-2.77862	-6.86197	1.27491e-05	0.0219417	0.592426	110522722
LOC110489785	NC_035091.1	17640392..17664595	9.56578	-2.781	-6.87331	1.00451e-05	0.0194129	0.466776	110489785
LOC110489786	NC_035091.1	complement(17581078..17586978)	0.239341	-2.82731	-7.09749	3.79447e-05	0.033908	1	110489786
LOC110531847	NC_035085.1	20430659..20442535	0.0791406	-2.8739	-7.33044	3.24671e-06	0.0159839	0.150868	110531847
LOC110494692	NC_035093.1	65122897..65134314	0.665012	-2.90862	-7.50899	4.54289e-05	0.0371803	1	110494692
LOC110489780	NC_035091.1	complement(17541076..17546178)	0.25548	-2.97289	-7.85107	3.69811e-05	0.0336949	1	110489780
LOC110489784	NC_035091.1	17681197..17696079	15.1643	-3.06521	-8.36991	1.42313e-05	0.0225664	0.661301	110489784
LOC110489782	NC_035091.1	17588559..17606938	63.0192	-3.13637	-8.79307	6.29629e-06	0.0188944	0.292576	110489782
LOC110499023	NC_035096.1	complement(13312228..13318344)	1.2938	-3.1375	-8.79999	8.90035e-06	0.0191731	0.413581	110499023
leap-2a	NC_035085.1	3513568..3542911	7.21705	-3.15094	-8.88233	1.38245e-05	0.0225664	0.642397	100136188
LOC110499607	NC_035096.1	complement(40031447..40035209)	0.339985	-3.24829	-9.5024	2.09849e-05	0.0265397	0.975125	110499607
LOC110493203	NC_035093.1	35198456..35210576	0.821049	-3.35246	-10.2139	3.09167e-05	0.0313121	1	110493203
fbxo40	NC_035103.1	complement(44763731..44781800)	1.07614	-3.61591	-12.2602	3.02809e-08	0.000469031	0.00140709	110508133
LOC110524780	NC_035077.1	complement(49127022..49136307)	7.21723	-3.68571	-12.8679	3.09968e-05	0.0313121	1	110524780
LOC110519363	NW_018632081.1	complement(280..1753)	2.80922	-3.72065	-13.1834	7.44032e-06	0.0188944	0.345737	110519363
LOC110494445	NC_035093.1	complement(51960590..51987010)	0.412014	-3.78263	-13.7621	8.26654e-07	0.00548895	0.0384129	110494445
LOC110498834	NC_035096.1	complement(3904558..3907401)	0.194964	-4.73455	-26.622	6.97127e-05	0.0483494	1	110498834
fam240a	NC_035082.1	46506740..46508416	6.71721	-4.90122	-29.8823	8.32574e-08	0.000967201	0.00386881	110526127
LOC110491217	NC_035092.1	1261570..1263016	307.433	-4.9959	-31.9092	1.15564e-10	5.37004e-06	5.37004e-06	110491217
LOC110521357	NC_035080.1	10357950..10364191	1.09721	-6.96886	-125.267	5.29087e-06	0.0188944	0.245856	110521357
