# Supplementary material for: Role of glucocorticoid and mineralocorticoid receptors in rainbow trout (Oncorhynchus mykiss) skeletal muscle: A transcriptomic perspective of cortisol action
Source: Front Physiol. 2023 Jan 6;13:1048008. doi: 10.3389/fphys.2022.1048008 (PMC9852899; doi:10.3389/fphys.2022.1048008)
Supplement: Supplementary file 12 [file Table12.XLSX]

## Sheet: Hoja 1
Comparison	Name	Fold change	FDR p-value		Name	Fold change	FDR p-value		Name	Fold change	FDR p-value
Vehicle vs. Cortisol	gr1	13.86	0.78		gr2	2.56	0.655		mr	-3.12	0.432
Vehicle vs. Mifepristone	gr1	2.29	0.086		gr2	3.41	0.411		mr	-4.56	0.887
Vehicle vs. Eplerenone	gr1	4.54	0.282		gr2	8.19	0.122		mr	7.22	0.761
Cortisol vs. Mifepristone/Cortisol	gr1	1.41	0.582		gr2	-3.22	0.309		mr	2.45	0.399
Cortisol vs. Eplerenone/Cortisol	gr1	-1.65	0.453		gr2	6.8	0.221		mr	3.12	0.491
