# Supplementary material for: Role of glucocorticoid and mineralocorticoid receptors in rainbow trout (Oncorhynchus mykiss) skeletal muscle: A transcriptomic perspective of cortisol action
Source: Front Physiol. 2023 Jan 6;13:1048008. doi: 10.3389/fphys.2022.1048008 (PMC9852899; doi:10.3389/fphys.2022.1048008)
Supplement: Supplementary file 13 [file Table5.XLSX]

## Sheet: Hoja1
Category	Term	Count	PValue	Fold Enrichment		Category	Term	Count	PValue	Fold Enrichment		Category	Term	Count	PValue	Fold Enrichment		Category	Term	Count	PValue	Fold Enrichment
GOTERM_BP_DIRECT	GO:0030049~muscle filament sliding	9	4.28868e-14	90.3876		GOTERM_CC_DIRECT	GO:0030017~sarcomere	6	3.51489e-08	62.3043		GOTERM_MF_DIRECT	GO:0000146~microfilament motor activity	4	1.70279e-05	76.7318		KEGG_PATHWAY	hsa04261:Adrenergic signaling in cardiomyocytes	5	0.00190116	8.9014
GOTERM_BP_DIRECT	GO:0006936~muscle contraction	7	2.92549e-07	24.9669		GOTERM_CC_DIRECT	GO:0005859~muscle myosin complex	5	5.26543e-08	126.556		GOTERM_MF_DIRECT	GO:0008307~structural constituent of muscle	4	0.000164905	36.539		KEGG_PATHWAY	hsa04260:Cardiac muscle contraction	4	0.00301699	13.1029
GOTERM_BP_DIRECT	GO:0046034~ATP metabolic process	5	1.27208e-06	59.6307		GOTERM_CC_DIRECT	GO:0032982~myosin filament	5	5.26543e-08	126.556		GOTERM_MF_DIRECT	GO:0042623~ATPase activity, coupled	3	0.000411583	95.9148		KEGG_PATHWAY	hsa05410:Hypertrophic cardiomyopathy (HCM)	4	0.00337255	12.5989
GOTERM_BP_DIRECT	GO:0060048~cardiac muscle contraction	5	5.14488e-06	42.404		GOTERM_CC_DIRECT	GO:0016459~myosin complex	4	0.000237764	32.3982		GOTERM_MF_DIRECT	GO:0003774~motor activity	4	0.000629948	23.2521		KEGG_PATHWAY	hsa05414:Dilated cardiomyopathy	4	0.00415849	11.699
GOTERM_BP_DIRECT	GO:0055010~ventricular cardiac muscle tissue morphogenesis	4	3.45879e-05	61.0618		GOTERM_CC_DIRECT	GO:0001725~stress fiber	4	0.000298873	29.9984		GOTERM_MF_DIRECT	GO:0003779~actin binding	6	0.00067409	8.28041		KEGG_PATHWAY	hsa05134:Legionellosis	3	0.0187271	13.6488
GOTERM_BP_DIRECT	GO:0006941~striated muscle contraction	3	0.000490745	88.0699		GOTERM_CC_DIRECT	GO:0005829~cytosol	19	0.000368363	2.32114		GOTERM_MF_DIRECT	GO:0005524~ATP binding	12	0.00101984	3.07954		KEGG_PATHWAY	hsa04010:MAPK signaling pathway	4	0.0751557	3.88425
GOTERM_BP_DIRECT	GO:0003009~skeletal muscle contraction	3	0.00170572	47.7045		GOTERM_CC_DIRECT	GO:0005739~mitochondrion	10	0.00396441	3.04266		GOTERM_MF_DIRECT	GO:0016887~ATPase activity	5	0.00118558	10.4825
GOTERM_BP_DIRECT	GO:0045214~sarcomere organization	3	0.00248886	39.4796		GOTERM_CC_DIRECT	GO:0005654~nucleoplasm	14	0.0119931	2.03653		GOTERM_MF_DIRECT	GO:0005516~calmodulin binding	5	0.00133548	10.1497
GOTERM_BP_DIRECT	GO:0034605~cellular response to heat	3	0.00403009	30.9435		GOTERM_CC_DIRECT	GO:0005865~striated muscle thin filament	2	0.0262472	73.6323		GOTERM_MF_DIRECT	GO:0043565~sequence-specific DNA binding	7	0.00188441	5.18458
GOTERM_BP_DIRECT	GO:0030522~intracellular receptor signaling pathway	3	0.0042471	30.1292		GOTERM_CC_DIRECT	GO:0030018~Z disc	3	0.0329545	10.296		GOTERM_MF_DIRECT	GO:0004879~RNA polymerase II transcription factor activity, ligand-activated sequence-specific DNA binding	3	0.00377937	31.9716
GOTERM_BP_DIRECT	GO:1902380~positive regulation of endoribonuclease activity	2	0.00511508	381.636		GOTERM_CC_DIRECT	GO:0031672~A band	2	0.0332879	57.854		GOTERM_MF_DIRECT	GO:0005515~protein binding	32	0.00586207	1.39751
GOTERM_BP_DIRECT	GO:1904722~positive regulation of mRNA endonucleolytic cleavage involved in unfolded protein response	2	0.00511508	381.636		GOTERM_CC_DIRECT	GO:0016234~inclusion body	2	0.0425981	44.9975		GOTERM_MF_DIRECT	GO:0003707~steroid hormone receptor activity	3	0.00894584	20.5532
GOTERM_BP_DIRECT	GO:0070434~positive regulation of nucleotide-binding oligomerization domain containing 2 signaling pathway	2	0.00766303	254.424		GOTERM_CC_DIRECT	GO:0072562~blood microparticle	3	0.0520516	7.99298		GOTERM_MF_DIRECT	GO:0017018~myosin phosphatase activity	2	0.010151	191.83
GOTERM_BP_DIRECT	GO:0043401~steroid hormone mediated signaling pathway	3	0.00935026	20.0861		GOTERM_CC_DIRECT	GO:0031430~M band	2	0.0541128	35.2155		GOTERM_MF_DIRECT	GO:0071558~histone demethylase activity (H3-K27 specific)	2	0.012673	153.464
GOTERM_BP_DIRECT	GO:0070370~cellular heat acclimation	2	0.0102046	190.818		GOTERM_CC_DIRECT	GO:0048471~perinuclear region of cytoplasm	5	0.0620509	3.26069		GOTERM_MF_DIRECT	GO:0055131~C3HC4-type RING finger domain binding	2	0.0151887	127.886
GOTERM_BP_DIRECT	GO:0045944~positive regulation of transcription from RNA polymerase II promoter	8	0.0115811	3.11222		GOTERM_CC_DIRECT	GO:0030016~myofibril	2	0.0654921	28.927		GOTERM_MF_DIRECT	GO:0035259~glucocorticoid receptor binding	2	0.0276736	69.7562
GOTERM_BP_DIRECT	GO:0034599~cellular response to oxidative stress	3	0.0116782	17.8892								GOTERM_MF_DIRECT	GO:0030898~actin-dependent ATPase activity	2	0.0326242	59.0245
GOTERM_BP_DIRECT	GO:0071557~histone H3-K27 demethylation	2	0.0127398	152.655								GOTERM_MF_DIRECT	GO:0044183~protein binding involved in protein folding	2	0.0350902	54.8084
GOTERM_BP_DIRECT	GO:0030240~skeletal muscle thin filament assembly	2	0.0127398	152.655								GOTERM_MF_DIRECT	GO:0031625~ubiquitin protein ligase binding	4	0.0364189	5.34717
GOTERM_BP_DIRECT	GO:0071376~cellular response to corticotropin-releasing hormone stimulus	2	0.0152687	127.212								GOTERM_MF_DIRECT	GO:0051015~actin filament binding	3	0.044486	8.71952
GOTERM_BP_DIRECT	GO:1903265~positive regulation of tumor necrosis factor-mediated signaling pathway	2	0.0152687	127.212								GOTERM_MF_DIRECT	GO:0017022~myosin binding	2	0.0545987	34.8781
GOTERM_BP_DIRECT	GO:1901029~negative regulation of mitochondrial outer membrane permeabilization involved in apoptotic signaling pathway	2	0.0177912	109.039								GOTERM_MF_DIRECT	GO:0032452~histone demethylase activity	2	0.05701	33.3617
GOTERM_BP_DIRECT	GO:0014883~transition between fast and slow fiber	2	0.0177912	109.039
GOTERM_BP_DIRECT	GO:0021952~central nervous system projection neuron axonogenesis	2	0.0203075	95.4091
GOTERM_BP_DIRECT	GO:0048739~cardiac muscle fiber development	2	0.0203075	95.4091
GOTERM_BP_DIRECT	GO:0006942~regulation of striated muscle contraction	2	0.0228174	84.8081
GOTERM_BP_DIRECT	GO:0090084~negative regulation of inclusion body assembly	2	0.0253211	76.3273
GOTERM_BP_DIRECT	GO:0042053~regulation of dopamine metabolic process	2	0.0253211	76.3273
GOTERM_BP_DIRECT	GO:0045475~locomotor rhythm	2	0.0253211	76.3273
GOTERM_BP_DIRECT	GO:0010941~regulation of cell death	2	0.0278185	69.3884
GOTERM_BP_DIRECT	GO:0007512~adult heart development	2	0.0327945	58.7133
GOTERM_BP_DIRECT	GO:0014898~cardiac muscle hypertrophy in response to stress	2	0.0377457	50.8848
GOTERM_BP_DIRECT	GO:0042026~protein refolding	2	0.0377457	50.8848
GOTERM_BP_DIRECT	GO:0031396~regulation of protein ubiquitination	2	0.0402119	47.7045
GOTERM_BP_DIRECT	GO:0050821~protein stabilization	3	0.0473804	8.41845
GOTERM_BP_DIRECT	GO:1902236~negative regulation of endoplasmic reticulum stress-induced intrinsic apoptotic signaling pathway	2	0.0475738	40.1722
GOTERM_BP_DIRECT	GO:0002026~regulation of the force of heart contraction	2	0.0475738	40.1722
GOTERM_BP_DIRECT	GO:0045333~cellular respiration	2	0.0524511	36.3463
GOTERM_BP_DIRECT	GO:0006367~transcription initiation from RNA polymerase II promoter	3	0.057742	7.5323
GOTERM_BP_DIRECT	GO:0032757~positive regulation of interleukin-8 production	2	0.0645377	29.3566
GOTERM_BP_DIRECT	GO:0002027~regulation of heart rate	2	0.0812064	23.1295
GOTERM_BP_DIRECT	GO:0009409~response to cold	2	0.0882609	21.202
GOTERM_BP_DIRECT	GO:2001240~negative regulation of extrinsic apoptotic signaling pathway in absence of ligand	2	0.0906007	20.629
GOTERM_BP_DIRECT	GO:0031397~negative regulation of protein ubiquitination	2	0.0999012	18.6164
