# Supplementary material for: Role of glucocorticoid and mineralocorticoid receptors in rainbow trout (Oncorhynchus mykiss) skeletal muscle: A transcriptomic perspective of cortisol action
Source: Front Physiol. 2023 Jan 6;13:1048008. doi: 10.3389/fphys.2022.1048008 (PMC9852899; doi:10.3389/fphys.2022.1048008)
Supplement: Supplementary file 14 [file Table7.XLSX]

## Sheet: Hoja1
Category	Term	Count	PValue	Fold Enrichment		Category	Term	Count	PValue	Fold Enrichment		Category	Term	Count	PValue	Fold Enrichment		Category	Term	Count	PValue	Fold Enrichment
GOTERM_BP_DIRECT	GO:0045109~intermediate filament organization	7	1.82753e-07	27.5987		GOTERM_CC_DIRECT	GO:0005883~neurofilament	4	5.56356e-06	107.747		GOTERM_MF_DIRECT	GO:0005200~structural constituent of cytoskeleton	7	4.30695e-06	16.1924		KEGG_PATHWAY	hsa04974:Protein digestion and absorption	6	0.000264786	10.1087
GOTERM_BP_DIRECT	GO:0032922~circadian regulation of gene expression	6	7.30264e-06	21.9901		GOTERM_CC_DIRECT	GO:0005882~intermediate filament	7	9.3615e-06	14.1773		GOTERM_MF_DIRECT	GO:0030020~extracellular matrix structural constituent conferring tensile strength	4	0.000581954	24.1476		KEGG_PATHWAY	hsa04512:ECM-receptor interaction	4	0.0131909	7.88781
GOTERM_BP_DIRECT	GO:0033693~neurofilament bundle assembly	3	4.24227e-05	260.216		GOTERM_CC_DIRECT	GO:0005737~cytoplasm	34	0.00128066	1.64426		GOTERM_MF_DIRECT	GO:0015175~neutral amino acid transmembrane transporter activity	3	0.00205205	43.6788		KEGG_PATHWAY	hsa05014:Amyotrophic lateral sclerosis	7	0.0157024	3.33715
GOTERM_BP_DIRECT	GO:0000122~negative regulation of transcription from RNA polymerase II promoter	14	6.22437e-05	3.76735		GOTERM_CC_DIRECT	GO:0005581~collagen trimer	4	0.00469516	11.7117		GOTERM_MF_DIRECT	GO:0015293~symporter activity	4	0.00334578	13.2007		KEGG_PATHWAY	hsa04510:Focal adhesion	5	0.026088	4.31671
GOTERM_BP_DIRECT	GO:0060052~neurofilament cytoskeleton organization	3	0.000501616	86.7387		GOTERM_CC_DIRECT	GO:0005604~basement membrane	4	0.00498554	11.4625		GOTERM_MF_DIRECT	GO:0005515~protein binding	61	0.00788853	1.20411		KEGG_PATHWAY	hsa03320:PPAR signaling pathway	3	0.0666202	6.94128
GOTERM_BP_DIRECT	GO:0045475~locomotor rhythm	3	0.000912879	65.0541		GOTERM_CC_DIRECT	GO:0005667~transcription factor complex	5	0.0102783	5.83049		GOTERM_MF_DIRECT	GO:0030280~structural constituent of epidermis	3	0.00954505	20.0686		KEGG_PATHWAY	hsa05202:Transcriptional misregulation in cancer	4	0.0945573	3.59652
GOTERM_BP_DIRECT	GO:0043153~entrainment of circadian clock by photoperiod	3	0.00575723	26.0216		GOTERM_CC_DIRECT	GO:0097418~neurofibrillary tangle	2	0.0181857	107.747		GOTERM_MF_DIRECT	GO:0001227~transcriptional repressor activity, RNA polymerase II transcription regulatory region sequence-specific binding	6	0.0103517	4.48664		KEGG_PATHWAY	hsa05222:Small cell lung cancer	3	0.0947009	5.65865
GOTERM_BP_DIRECT	GO:0030522~intracellular receptor signaling pathway	3	0.00777929	22.3042		GOTERM_CC_DIRECT	GO:0005587~collagen type IV trimer	2	0.0253683	76.9624		GOTERM_MF_DIRECT	GO:0005201~extracellular matrix structural constituent	4	0.0177678	7.17429
GOTERM_BP_DIRECT	GO:0000226~microtubule cytoskeleton organization	4	0.0143814	7.76765		GOTERM_CC_DIRECT	GO:0005788~endoplasmic reticulum lumen	5	0.0259858	4.40144		GOTERM_MF_DIRECT	GO:0004879~RNA polymerase II transcription factor activity, ligand-activated sequence-specific DNA binding	3	0.0196361	13.7507
GOTERM_BP_DIRECT	GO:0006811~ion transport	4	0.0161555	7.43475		GOTERM_CC_DIRECT	GO:0005634~nucleus	31	0.0261283	1.40817		GOTERM_MF_DIRECT	GO:0008140~cAMP response element binding protein binding	2	0.0391717	49.5026
GOTERM_BP_DIRECT	GO:0045600~positive regulation of fat cell differentiation	3	0.0178643	14.4565		GOTERM_CC_DIRECT	GO:0015630~microtubule cytoskeleton	4	0.0357586	5.46941		GOTERM_MF_DIRECT	GO:0061629~RNA polymerase II sequence-specific DNA binding transcription factor binding	4	0.0392818	5.26624
GOTERM_BP_DIRECT	GO:0071376~cellular response to corticotropin-releasing hormone stimulus	2	0.0188139	104.086		GOTERM_CC_DIRECT	GO:0098981~cholinergic synapse	2	0.0360451	53.8737		GOTERM_MF_DIRECT	GO:0043565~sequence-specific DNA binding	5	0.0420346	3.77307
GOTERM_BP_DIRECT	GO:0046321~positive regulation of fatty acid oxidation	2	0.0225346	86.7387		GOTERM_CC_DIRECT	GO:0098685~Schaffer collateral - CA1 synapse	3	0.04056	9.28857		GOTERM_MF_DIRECT	GO:0035259~glucocorticoid receptor binding	2	0.0581859	33.0018
GOTERM_BP_DIRECT	GO:0030198~extracellular matrix organization	4	0.024822	6.30827		GOTERM_CC_DIRECT	GO:0005859~muscle myosin complex	2	0.0535838	35.9158		GOTERM_MF_DIRECT	GO:0042803~protein homodimerization activity	7	0.0647557	2.43
GOTERM_BP_DIRECT	GO:0042752~regulation of circadian rhythm	3	0.0260105	11.828		GOTERM_CC_DIRECT	GO:0045095~keratin filament	3	0.0567761	7.69624		GOTERM_MF_DIRECT	GO:0000981~RNA polymerase II transcription factor activity, sequence-specific DNA binding	10	0.0673397	1.93521
GOTERM_BP_DIRECT	GO:0006029~proteoglycan metabolic process	2	0.0336133	57.8258		GOTERM_CC_DIRECT	GO:0098688~parallel fiber to Purkinje cell synapse	2	0.0605108	31.6904		GOTERM_MF_DIRECT	GO:0044877~macromolecular complex binding	5	0.0833821	2.98929
GOTERM_BP_DIRECT	GO:0031424~keratinization	3	0.0345511	10.1383		GOTERM_CC_DIRECT	GO:0031012~extracellular matrix	4	0.0696288	4.16013		GOTERM_MF_DIRECT	GO:0005524~ATP binding	11	0.0855998	1.76337
GOTERM_BP_DIRECT	GO:0042053~regulation of dopamine metabolic process	2	0.0372786	52.0432		GOTERM_CC_DIRECT	GO:0005654~nucleoplasm	21	0.0723855	1.43608		GOTERM_MF_DIRECT	GO:0003707~steroid hormone receptor activity	2	0.0878391	21.5229
GOTERM_BP_DIRECT	GO:0021952~central nervous system projection neuron axonogenesis	2	0.0409302	47.312		GOTERM_CC_DIRECT	GO:0032982~myosin filament	2	0.0742151	25.6541
GOTERM_BP_DIRECT	GO:0006814~sodium ion transport	3	0.0458359	8.67387		GOTERM_CC_DIRECT	GO:0016020~membrane	15	0.0773504	1.58639
GOTERM_BP_DIRECT	GO:0006631~fatty acid metabolic process	3	0.050491	8.21735		GOTERM_CC_DIRECT	GO:0016460~myosin II complex	2	0.0843637	22.4474
GOTERM_BP_DIRECT	GO:0070207~protein homotrimerization	2	0.0589843	32.527
GOTERM_BP_DIRECT	GO:0048557~embryonic digestive tract morphogenesis	2	0.0625546	30.6137
GOTERM_BP_DIRECT	GO:0015804~neutral amino acid transport	2	0.0661117	28.9129
GOTERM_BP_DIRECT	GO:0031668~cellular response to extracellular stimulus	2	0.0696554	27.3912
GOTERM_BP_DIRECT	GO:0045892~negative regulation of transcription, DNA-templated	6	0.0730846	2.64627
GOTERM_BP_DIRECT	GO:0061564~axon development	2	0.0731858	26.0216
GOTERM_BP_DIRECT	GO:0043401~steroid hormone mediated signaling pathway	2	0.076703	24.7825
GOTERM_BP_DIRECT	GO:0021772~olfactory bulb development	2	0.076703	24.7825
GOTERM_BP_DIRECT	GO:0045944~positive regulation of transcription from RNA polymerase II promoter	9	0.0839192	1.95
GOTERM_BP_DIRECT	GO:0016310~phosphorylation	3	0.0860862	6.05154

## Sheet: Hoja3
Category	Term	Count	%	PValue	Genes	List Total	Pop Hits	Pop Total	Fold Enrichment	Bonferroni	Benjamini	FDR
GOTERM_MF_DIRECT	GO:0005200~structural constituent of cytoskeleton	7	8.86076	4.30695e-06	TUBA1B, TUBB2A, NEFL, NEFM, NEFH, INA, PRPH	76	107	18811	16.1924	0.000882538	0.000882925	0.000870005
GOTERM_MF_DIRECT	GO:0030020~extracellular matrix structural constituent conferring tensile strength	4	5.06329	0.000581954	COL2A1, COL4A4, COL9A1, COL4A5	76	41	18811	24.1476	0.11249	0.0596503	0.0587774
GOTERM_MF_DIRECT	GO:0015175~neutral amino acid transmembrane transporter activity	3	3.79747	0.00205205	SLC43A1, SLC1A2, SLC1A5	76	17	18811	43.6788	0.343677	0.140223	0.138171
GOTERM_MF_DIRECT	GO:0015293~symporter activity	4	5.06329	0.00334578	SLC22A5, SLC1A2, SLC1A5, SLC16A3	76	75	18811	13.2007	0.496934	0.171471	0.168962
GOTERM_MF_DIRECT	GO:0005515~protein binding	61	77.2152	0.00788853	MIDN, ZBTB21, HSPB1, SPPL3, MYLK4, RPH3A, TUBA1B, LBH, HEY1, NEFL, NEFM, TRIM26, NEFH, SLC16A3, NINL, RAG1, CHRNB2, USP2, ATG9A, TFE3, KRT8, ATP1B4, HNF1B, KRT76, MYH1, PPM1A, MYH2, TUBB2A, GFOD1, NCOA7, SIK1, ANGPTL4, INA, PPARD, FKBP5, SLC22A5, SLC43A1, SLC1A2, CREM, SLC1A5, KRT86, NKD1, CIART, NUAK1, ASCC3, TRPM5, FNIP1, PRPH, SLC12A3, GK, GADD45A, CKMT1A, HUWE1, ZNF79, ELL2, NR4A2, SKI, NLRP1…	76	12539	18811	1.20411	0.802805	0.303158	0.298721
GOTERM_MF_DIRECT	GO:0030280~structural constituent of epidermis	3	3.79747	0.00954505	KRT8, KRT76, KRT86	76	37	18811	20.0686	0.860003	0.303158	0.298721
GOTERM_MF_DIRECT	GO:0001227~transcriptional repressor activity, RNA polymerase II transcription regulatory region sequence-specific binding	6	7.59494	0.0103517	SKI, HEY1, ZBTB21, CREM, ZNF79, PPARD	76	331	18811	4.48664	0.881538	0.303158	0.298721
GOTERM_MF_DIRECT	GO:0005201~extracellular matrix structural constituent	4	5.06329	0.0177678	COL2A1, COL4A4, COL9A1, COL4A5	76	138	18811	7.17429	0.974654	0.447266	0.44072
GOTERM_MF_DIRECT	GO:0004879~RNA polymerase II transcription factor activity, ligand-activated sequence-specific DNA binding	3	3.79747	0.0196361	NR4A2, NR4A3, PPARD	76	54	18811	13.7507	0.982845	0.447266	0.44072
GOTERM_MF_DIRECT	GO:0008140~cAMP response element binding protein binding	2	2.53165	0.0391717	CREM, SIK1	76	10	18811	49.5026	0.999723	0.71809	0.707582
GOTERM_MF_DIRECT	GO:0061629~RNA polymerase II sequence-specific DNA binding transcription factor binding	4	5.06329	0.0392818	HEY1, ID2, HSPB1, PPARD	76	188	18811	5.26624	0.999729	0.71809	0.707582
GOTERM_MF_DIRECT	GO:0043565~sequence-specific DNA binding	5	6.32911	0.0420346	NR4A2, NR4A3, ZBTB21, RAG1, PPARD	76	328	18811	3.77307	0.99985	0.71809	0.707582
GOTERM_MF_DIRECT	GO:0035259~glucocorticoid receptor binding	2	2.53165	0.0581859	NR4A2, NR4A3	76	15	18811	33.0018	0.999995	0.917546	0.904119
GOTERM_MF_DIRECT	GO:0042803~protein homodimerization activity	7	8.86076	0.0647557	NR4A3, PANK1, GADD45A, HSPB1, HNF1B, SPPL3, RAG1	76	713	18811	2.43	0.999999	0.92031	0.906842
GOTERM_MF_DIRECT	GO:0000981~RNA polymerase II transcription factor activity, sequence-specific DNA binding	10	12.6582	0.0673397	NR4A2, SKI, NR4A3, HEY1, TFE3, ZBTB21, CREM, HNF1B, ZNF79, PPARD	76	1279	18811	1.93521	0.999999	0.92031	0.906842
GOTERM_MF_DIRECT	GO:0044877~macromolecular complex binding	5	6.32911	0.0833821	CHRNB2, RPH3A, KRT8, NEFL, HNF1B	76	414	18811	2.98929	1	1	0.98575
GOTERM_MF_DIRECT	GO:0005524~ATP binding	11	13.9241	0.0855998	MYH1, NUAK1, MYH2, NLRP12, SLC22A5, GK, PANK1, CKMT1A, SIK1, ASCC3, MYLK4	76	1544	18811	1.76337	1	1	0.98575
GOTERM_MF_DIRECT	GO:0003707~steroid hormone receptor activity	2	2.53165	0.0878391	NR4A3, PPARD	76	23	18811	21.5229	1	1	0.98575
