# Supplementary material for: Role of glucocorticoid and mineralocorticoid receptors in rainbow trout (Oncorhynchus mykiss) skeletal muscle: A transcriptomic perspective of cortisol action
Source: Front Physiol. 2023 Jan 6;13:1048008. doi: 10.3389/fphys.2022.1048008 (PMC9852899; doi:10.3389/fphys.2022.1048008)
Supplement: Supplementary file 15 [file Table8.XLSX]

## Sheet: Hoja 1
Name	Chromosome	Region	Max group mean	Log₂ fold change	Fold change	P-value	FDR p-value	Bonferroni	GeneID
LOC110486651	NC_035089.1	complement(45283913..45300570)	6.31177	8.06219	267.276	1.36767e-08	0.000105922	0.00063553	110486651
slc12a3	NC_035078.1	complement(53745784..53754229)	0.457789	6.48597	89.6336	1.16891e-08	0.000105922	0.00054317	110494770
LOC110539178	NC_035088.1	complement(78692677..78705862)	2.48216	5.93333	61.1096	5.17124e-05	0.0301895	1	110539178
LOC110522538	NC_035080.1	complement(76210669..76217339)	0.32782	5.90953	60.1098	7.26177e-06	0.011248	0.33744	110522538
LOC110507919	NC_035103.1	28427329..28433785	1.52615	5.8203	56.5049	1.77005e-06	0.00456949	0.0822509	110507919
LOC110504105	NC_035100.1	complement(25982101..25989284)	1.01085	5.62592	49.3821	1.69772e-05	0.0179295	0.788896	110504105
LOC110530204	NC_035084.1	52331197..52335295	0.229199	5.55784	47.1062	6.33718e-05	0.0327196	1	110530204
LOC100135946	NC_035081.1	18915556..18918015	0.301054	5.5168	45.7848	4.73872e-05	0.0289736	1	100135946
LOC110509894	NC_035105.1	complement(25849253..25853270)	3.44171	5.1862	36.4084	8.65386e-05	0.0367822	1	110509894
antiprot1	NC_035080.1	73999273..74001855	0.687094	5.17092	36.0248	7.39462e-07	0.00245438	0.0343613	100136095
LOC110524746	NC_035081.1	81768165..81770778	0.323749	5.0246	32.5503	5.45735e-05	0.0301895	1	110524746
LOC110524788	NC_035081.1	84743363..84749678	0.245451	5.02135	32.477	2.13752e-05	0.0208706	0.993264	110524788
LOC110530587	NC_035084.1	complement(70002131..70061129)	0.17315	4.73991	26.7212	2.36259e-07	0.00121983	0.0109785	110530587
cyp2k5	NC_035085.1	complement(60770213..60779752)	0.299566	4.707	26.1185	1.11035e-05	0.0151753	0.515959	100137012
fgb	NC_035085.1	complement(808399..817866)	0.38235	4.54146	23.2871	4.69065e-05	0.0289736	1	110531328
LOC110528096	NC_035083.1	complement(50242955..50256687)	0.238688	4.35864	20.5154	2.4798e-05	0.0223528	1	110528096
LOC110524827	NC_035081.1	complement(86428778..86457822)	0.477062	4.33252	20.1474	3.39949e-05	0.0250015	1	110524827
LOC110531325	NC_035085.1	797193..800340	0.530318	4.22097	18.6482	3.66169e-06	0.00810244	0.170151	110531325
LOC110528548	NC_035083.1	complement(69384748..69395991)	0.219978	4.09611	17.1022	4.59009e-05	0.0288233	1	110528548
cfh	NC_035081.1	84705977..84722683	0.270598	4.07611	16.8667	1.21063e-06	0.00330915	0.0562556	100136111
LOC110501611	NC_035098.1	24725525..24733271	0.616395	4.03537	16.3971	6.84988e-05	0.0335053	1	110501611
LOC110536110	NC_035078.1	complement(3402914..3404260)	1.47973	3.71992	13.1767	9.20991e-05	0.0373257	1	110536110
LOC100136344	NC_035077.1	complement(81984510..81985156)	1.44789	3.56972	11.8738	8.70715e-05	0.0367822	1	100136344
hce23	NC_035102.1	8088956..8092009	42.9465	3.3453	10.1633	5.10308e-06	0.00981734	0.23713	100305207
LOC110520220	NC_035079.1	57858292..57861808	0.412395	3.31505	9.95241	2.3326e-05	0.0217804	1	110520220
LOC110534419	NC_035086.1	56689290..56696068	0.41552	3.27837	9.7026	2.54439e-05	0.0223528	1	110534419
LOC110509901	NC_035105.1	complement(25912235..25918482)	8.76178	3.15108	8.88323	1.82979e-05	0.0188948	0.850266	110509901
LOC110524716	NC_035081.1	79956826..80005164	0.0832217	3.13347	8.77544	7.08257e-05	0.0339292	1	110524716
LOC110510206	NC_035079.1	17392794..17395277	2.04019	3.08719	8.49839	0.000105153	0.041061	1	110510206
LOC110497363	NC_035095.1	complement(7959139..7986499)	0.944275	3.04771	8.269	5.21097e-06	0.00981734	0.242143	110497363
p2ry8	NC_035079.1	complement(43557984..43565945)	0.204119	2.95338	7.7456	0.00010624	0.0411395	1	110519968
LOC110524274	NC_035081.1	59135746..59140328	1.7111	2.93064	7.62449	2.60834e-05	0.0223528	1	110524274
cfd	NC_035080.1	13334985..13337205	5.58478	2.92257	7.58194	1.34254e-05	0.0168608	0.623849	100653474
LOC110533267	NC_035086.1	2569346..2577695	1.7656	2.86692	7.29506	5.85577e-05	0.0314051	1	110533267
cbpa1	NC_035077.1	complement(45633853..45638176)	3.54798	2.77749	6.85661	3.50703e-05	0.0250015	1	100305236
gp91phox	NC_035094.1	complement(6248981..6255101)	2.8354	2.71017	6.54397	1.55386e-05	0.0176088	0.722048	100329199
cytf	NC_035077.1	63331389..63339442	1.2253	2.68914	6.44929	3.53198e-08	0.000205155	0.00164124	100305284
LOC110537696	NC_035088.1	42678970..42700279	1.67166	2.59421	6.03858	5.97581e-05	0.0314051	1	110537696
mmp9	NC_035085.1	63269075..63273363	8.80201	2.58236	5.98917	4.35907e-05	0.0288233	1	100136060
LOC110517486	NC_035079.1	complement(32836764..32838741)	1.66688	2.58231	5.98899	5.34342e-05	0.0301895	1	110517486
LOC110490129	NC_035091.1	40699291..40752478	0.379186	2.54986	5.85579	2.78971e-05	0.0227425	1	110490129
LOC110532796	NC_035085.1	63199776..63200713	8.21883	2.54042	5.81757	7.45237e-05	0.0346297	1	110532796
LOC110505992	NC_035101.1	81629242..81642837	7.94201	2.454	5.47934	3.16902e-07	0.00133871	0.0147258	110505992
LOC110506480	NC_035102.1	15802902..15818882	4.3869	2.44358	5.43989	7.2769e-05	0.0345044	1	110506480
LOC110495505	NC_035094.1	complement(6057978..6066002)	3.62182	2.37641	5.19244	2.6841e-05	0.0223528	1	110495505
LOC110495453	NC_035094.1	complement(3919392..3925994)	0.557461	2.36615	5.15564	0.000118556	0.0440726	1	110495453
LOC110530492	NC_035084.1	complement(67687517..67690002)	1.38598	2.32374	5.00629	9.26256e-05	0.0373257	1	110530492
ncam2	NC_035083.1	complement(20484499..20880986)	0.226483	2.29104	4.8941	3.44822e-05	0.0250015	1	110527591
LOC110538268	NC_035078.1	complement(8250805..8254158)	0.951565	2.24415	4.73756	2.90471e-05	0.0232717	1	110538268
LOC110527143	NC_035077.1	61935537..61937614	1.10411	2.16907	4.49733	0.000123583	0.0452176	1	110527143
LOC110494243	NC_035093.1	complement(43689326..43694403)	1.20794	2.00883	4.02456	0.000109279	0.0419667	1	110494243
LOC110501543	NC_035098.1	complement(18785356..18787371)	3.57215	1.92228	3.79022	1.59157e-05	0.0176088	0.739569	110501543
LOC110488771	NC_035090.1	53079948..53088243	0.988478	1.85276	3.61191	4.46935e-05	0.0288233	1	110488771
LOC110488097	NC_035090.1	17721903..17739022	6.21623	1.84023	3.58066	1.96751e-08	0.000130609	0.000914263	110488097
LOC110508716	NC_035104.1	20422279..20430321	2.80996	1.8053	3.49503	5.08433e-05	0.0301895	1	110508716
ddit4	NC_035077.1	complement(83843012..83844911)	45.5356	1.67476	3.19266	6.09078e-07	0.00217713	0.0283026	110531799
LOC110492036	NC_035092.1	complement(39096022..39101557)	0.963541	1.65288	3.1446	5.9755e-05	0.0314051	1	110492036
LOC110490222	NC_035091.1	complement(44935081..44975447)	5.55539	1.63255	3.1006	4.993e-06	0.00981734	0.232015	110490222
LOC110528020	NC_035083.1	complement(46768610..46892056)	1.44782	1.60532	3.04264	9.31777e-05	0.0373257	1	110528020
LOC110528322	NC_035083.1	complement(58644509..58670086)	0.167293	1.58196	2.99377	9.14497e-05	0.0373257	1	110528322
LOC110504284	NC_035101.1	81645100..81660741	6.64951	1.56893	2.96685	7.10414e-06	0.011248	0.330115	110504284
LOC110502030	NC_035098.1	23294857..23297108	6.10554	1.50169	2.83175	1.43564e-05	0.0175556	0.667112	110502030
LOC110485453	NC_035089.1	complement(4352044..4359284)	9.26286	1.41075	2.65875	7.8937e-05	0.0352697	1	110485453
LOC110538275	NC_035088.1	69775098..69789813	1.85805	1.40416	2.64664	7.05513e-05	0.0339292	1	110538275
LOC110525406	NC_035082.1	16220627..16229508	11.1936	1.3815	2.60538	3.60485e-05	0.0250015	1	110525406
LOC110537923	NC_035088.1	58573570..58575017	42.073	1.35037	2.54978	5.6378e-05	0.0308209	1	110537923
LOC110497191	NC_035095.1	complement(807318..825602)	2.56155	1.3503	2.54965	3.92544e-05	0.0264358	1	110497191
LOC110508134	NC_035079.1	complement(10276998..10289432)	9.32037	1.33024	2.51444	3.20307e-06	0.00744202	0.14884	110508134
LOC110525596	NC_035082.1	22151865..22155390	0.843653	1.31807	2.49332	8.5515e-05	0.0367822	1	110525596
LOC110488168	NC_035090.1	complement(20790009..20797112)	1.51892	1.30651	2.47342	8.03554e-05	0.0355615	1	110488168
LOC110509176	NC_035104.1	40181977..40195731	5.95711	1.26731	2.40712	0.000126567	0.0459476	1	110509176
LOC110538372	NC_035088.1	complement(72119167..72123568)	6.15771	1.24607	2.37194	0.000133413	0.0469654	1	110538372
LOC110523926	NC_035081.1	41544936..41552870	3.87676	1.24049	2.36279	6.80367e-05	0.0335053	1	110523926
LOC110492114	NC_035092.1	42407119..42425152	2.88521	1.19753	2.29346	6.73212e-05	0.0335053	1	110492114
LOC110489223	NC_035090.1	76591617..76676380	8.02539	1.13091	2.18996	8.23535e-05	0.0357645	1	110489223
LOC110493604	NC_035093.1	complement(13434212..13456630)	1.98756	1.1043	2.14994	6.505e-05	0.0332141	1	110493604
LOC110500180	NC_035097.1	19514676..19526909	6.41562	-1.203	-2.30218	0.000130398	0.0462546	1	110500180
LOC110501840	NC_035098.1	37161431..37165133	14.8678	-1.35962	-2.56618	0.000128934	0.0462546	1	110501840
LOC110503841	NC_035100.1	complement(14952067..14961910)	0.549369	-1.37409	-2.59204	5.21139e-05	0.0301895	1	110503841
ATP8	NC_001717.1	8947..9114	800.323	-1.43408	-2.70211	7.36869e-05	0.0345867	1	807971
LOC110508558	NC_035104.1	11523178..11530344	1.59994	-1.49256	-2.81388	0.000143352	0.0493427	1	110508558
LOC110518097	NW_018605038.1	complement(44519..60051)	3.3039	-1.60261	-3.03693	7.66514e-05	0.0349922	1	110518097
LOC110489981	NC_035091.1	26989907..27002688	1.77012	-1.61968	-3.07306	6.015e-05	0.0314051	1	110489981
LOC110529845	NC_035084.1	complement(31138402..31146134)	171.444	-1.6916	-3.23015	0.000111129	0.0423276	1	110529845
LOC110505631	NC_035101.1	complement(61554725..61576377)	0.285887	-1.70905	-3.26945	3.40023e-05	0.0250015	1	110505631
LOC110533762	NC_035086.1	complement(32058645..32076018)	1.11153	-1.71549	-3.28407	0.000113036	0.0427039	1	110533762
LOC110527522	NC_035083.1	complement(16432372..16442718)	0.749481	-1.74391	-3.34942	8.95911e-05	0.0373127	1	110527522
LOC110491626	NC_035092.1	complement(18772991..18778180)	17.6773	-1.75929	-3.38532	3.24079e-05	0.0250015	1	110491626
LOC110500316	NC_035097.1	27605603..27612357	31.7564	-1.8334	-3.56376	4.40538e-05	0.0288233	1	110500316
LOC110537155	NC_035078.1	complement(5555825..5564307)	0.805017	-1.84239	-3.58603	8.99334e-05	0.0373127	1	110537155
LOC110505817	NC_035101.1	complement(72318857..72322951)	3.17143	-1.85022	-3.60555	0.000129672	0.0462546	1	110505817
LOC110521877	NC_035080.1	40841217..40856670	0.180459	-1.86407	-3.64033	0.000140442	0.0487018	1	110521877
klhl23	NC_035098.1	complement(15055119..15058791)	0.828284	-1.86665	-3.64684	1.50488e-05	0.0176088	0.699287	110501469
LOC110500222	NC_035097.1	complement(22353018..22365101)	3.00975	-1.88816	-3.70163	2.64525e-07	0.00122919	0.0122919	110500222
LOC110485341	NC_035089.1	complement(1205772..1221886)	1.6951	-1.89574	-3.72112	7.85817e-05	0.0352697	1	110485341
LOC110528289	NC_035083.1	57113587..57149120	0.981059	-1.90521	-3.74564	5.14524e-05	0.0301895	1	110528289
LOC110509962	NC_035105.1	28156953..28160122	4.27426	-1.9154	-3.77219	8.34194e-06	0.0121135	0.387633	110509962
LOC110531632	NC_035077.1	complement(82758987..82774608)	9.35737	-2.00895	-4.0249	7.56046e-06	0.0113329	0.351319	110531632
LOC110527336	NC_035083.1	complement(6881196..6888922)	0.292107	-2.02374	-4.06638	5.4038e-05	0.0301895	1	110527336
LOC110535597	NC_035087.1	complement(30765904..30774750)	2.94399	-2.13091	-4.37995	1.1513e-05	0.0152853	0.534985	110535597
LOC110525548	NC_035082.1	complement(20342085..20365347)	1.29843	-2.14713	-4.42946	3.00815e-05	0.023692	1	110525548
LOC110535216	NC_035087.1	6461890..6492706	0.178069	-2.24287	-4.73338	1.57897e-05	0.0176088	0.733714	110535216
LOC100653472	NC_035094.1	complement(33480529..33482808)	1.48548	-2.27748	-4.84829	0.000140399	0.0487018	1	100653472
LOC110505559	NC_035101.1	59322027..59378276	0.131646	-2.46005	-5.50235	5.37919e-05	0.0301895	1	110505559
LOC110528228	NC_035083.1	55444942..55449825	0.876533	-2.54414	-5.83259	0.000100396	0.0395356	1	110528228
LOC110528594	NC_035077.1	complement(67101112..67104493)	0.558496	-2.6134	-6.11944	2.60271e-05	0.0223528	1	110528594
thumpd1	NC_035081.1	90350859..90366697	0.788603	-2.788	-6.90671	4.58169e-05	0.0288233	1	110523056
myo5b	NC_035088.1	complement(15852633..15925297)	0.0900011	-2.91365	-7.53523	7.681e-05	0.0349922	1	110537143
LOC110522489	NC_035080.1	73112194..73117567	164.775	-3.04534	-8.2554	1.66958e-05	0.0179295	0.775821	110522489
LOC110531220	NC_035077.1	complement(5662432..5673336)	0.737445	-3.09793	-8.56188	3.52051e-05	0.0250015	1	110531220
LOC110525403	NC_035082.1	16053726..16063914	1.33634	-3.13967	-8.8132	1.93391e-05	0.0195358	0.898648	110525403
LOC110517400	NW_018594998.1	16252..18767	3.63749	-3.18384	-9.08724	6.57591e-05	0.0332141	1	110517400
LOC110526497	NC_035082.1	complement(66685888..66704444)	0.263231	-3.26541	-9.61585	0.000116371	0.043609	1	110526497
LOC110508895	NC_035104.1	29509184..29513120	0.762857	-3.333	-10.077	8.63124e-06	0.0121538	0.401076	110508895
LOC110492689	NC_035092.1	complement(67942425..67945641)	7.4563	-3.40536	-10.5954	2.8455e-09	6.61123e-05	0.000132225	110492689
LOC110521361	NC_035080.1	10404490..10406919	65.4944	-3.46627	-11.0523	1.09937e-06	0.00319285	0.0510857	110521361
LOC110533277	NC_035086.1	2832160..2837628	1.55199	-3.57608	-11.9263	0.000120851	0.044569	1	110533277
LOC110507415	NC_035079.1	8374009..8377567	4.22037	-3.59325	-12.0691	6.83348e-06	0.011248	0.317538	110507415
LOC110493785	NC_035093.1	19827602..19836138	0.456631	-3.73766	-13.3398	3.57464e-05	0.0250015	1	110493785
LOC110501563	NC_035098.1	complement(19275764..19278180)	0.758855	-3.90123	-14.9413	2.15587e-05	0.0208706	1	110501563
LOC110493627	NC_035093.1	complement(13933497..13938632)	0.631116	-4.01049	-16.1167	6.88122e-06	0.011248	0.319756	110493627
LOC110499450	NC_035096.1	complement(35058210..35069193)	0.80737	-4.46627	-22.1045	6.09629e-06	0.0108955	0.283282	110499450
LOC110496048	NC_035094.1	complement(26723988..26737352)	0.253328	-4.50595	-22.7209	3.83659e-05	0.0262175	1	110496048
LOC110533272	NC_035086.1	complement(2852244..2859654)	0.891879	-4.54057	-23.2728	5.78805e-07	0.00217713	0.0268959	110533272
LOC110517429	NW_018595382.1	48..1206	1.11155	-4.5669	-23.7015	8.22626e-05	0.0357645	1	110517429
LOC110515952	NW_018573028.1	26073..27826	0.730549	-4.94088	-30.7151	2.19632e-06	0.00537151	0.102059	110515952
LOC110531488	NC_035085.1	6760944..6767161	0.467498	-5.31622	-39.842	1.20283e-05	0.0155258	0.55893	110531488
LOC110533271	NC_035086.1	complement(2821029..2830787)	0.981226	-5.32657	-40.1288	1.12187e-08	0.000105922	0.000521309	110533271
LOC100136185	NC_035095.1	complement(2849159..2863111)	0.654776	-6.01278	-64.5697	2.34359e-05	0.0217804	1	100136185
LOC110537437	NC_035088.1	complement(27435971..27444402)	0.258859	-6.0167	-64.7452	9.34297e-07	0.00289433	0.0434149	110537437
LOC110537255	NC_035088.1	complement(21634999..21635834)	1.7644	-6.01728	-64.7713	2.6938e-05	0.0223528	1	110537255
LOC110494570	NC_035093.1	58877137..58887731	0.19333	-6.13521	-70.2884	5.28177e-06	0.00981734	0.245433	110494570
LOC110533275	NC_035086.1	complement(2866281..2869397)	0.971842	-6.92551	-121.559	8.21212e-09	0.000105922	0.000381601	110533275
LOC110516211	NW_018576025.1	785..1536	8.76502	-7.32622	-160.476	2.23129e-09	6.61123e-05	0.000103684	110516211
LOC110510413	NW_018522851.1	complement(8348..12581)	1.16828	-9.6907	-826.404	9.92584e-05	0.0394217	1	110510413
